# Supplementary material for: Effectiveness of low frequency vibration on the rate of canine retraction:A randomized controlled clinical trial
Source: Research Square preprint supplement (doi:10.21203/rs.3.rs-3347770/v1), 2023-10-17
Supplement: Supplementary file 1 [file 590efa57c68957b0e333c16a.xlsx]

## Sheet: Sheet1
Name	ID	Birthday	Scan Date	UR3-FP	UR3Center-FP	UR3apex-FP	UL3tip-FP	UL3Center-FP	UL3apex-FP	UR6tip-FP	UR6Center-FP	UR6apex-FP	UL6tip-FP	UL6center-FP	UL6apex-FP	UR3-tipping/HR	UR3-tipping-/FP	UL3-tipping/HR	UL3tipping-FP	UR6-tipping- FP	UR6-tipping - HP	UL6tipping- FP	UL6tipping - Horizontal Plane	UR3-torque/ MSP	UR3 torque- Horizontal plane	UL3 torque - MSP	UL3torque- HP	UR6torque - MSP	UR6torque - HP	UL6torque - MSP	UL6torque - HP	UR3Rotation - MSP	UR3Rotation - FP	UL3Rotation - MSP	UL3Rotation - FP	UR6Rotation - fp	UR6Rotation - msp	UL6Rotation - fp	UL6Rotation - msp	UR3-Root Length	UL3-Root Length
abnoub post	post		20180128	2.81	1.6	0.4	3.29	0.98	1.34	11.24	11.91	12.59	15	14.22	13.44	5.23	84.77	10.39	79.61	3.87	86.13	4.73	85.27	7.15	82.85	13.18	73.44	4.83	83.81	4.86	83.22	32.35	57.53	6.8	82.8	21.99	67.97	17.75	74.55	26.68	26.37
abnoub pre	pre	19970423	20170713	8.34	3.91	0.52	8.22	2.52	3.17	12.18	12.87	13.57	15.13	14.86	14.59	18.58	71.42	23.98	66.02	4.02	85.99	1.51	88.49	5.4	84.6	10.63	70.78	6.88	82.04	3.12	86.54	50.81	38.61	44.39	45.13	15.35	75.77	11.87	84.45	27.91	28.03
	Pre-Post			5.53	2.31	0.12	4.93	1.54	1.83	0.94	0.96	0.98	0.13	0.64	1.15	13.35	-13.35	13.59	-13.59	0.15	-0.14	-3.22	3.22	-1.75	1.75	-2.55	-2.66	2.05	-1.77	-1.74	3.32	18.46	-18.92	37.59	-37.67	-6.64	7.8	-5.88	9.9	1.23	1.66
Amin,Abd El Aziz,M	pre	19890926	20170427	9.5	4.41	0.68	9.93	3.9	2.12	11.82	11.92	12.03	11.64	10.81	9.98	19.92	70.08	23.01	66.99	0	89.41	4.51	85.48	4.23	85.77	8.28	65.83	3.41	86.54	0.82	85.41	42.11	47.85	41.03	48.87	11.36	73.56	15.38	74.56	29.96	31.1
AbdelAziz Amen	post		20180225	5.83	2.26	1.31	5.25	1.73	1.78	10.92	11.11	11.3	11.18	10.71	10.25	13.89	76.11	13.56	76.44	1.06	88.93	2.45	87.55	4.29	85.71	10.31	70.36	7.39	82.53	0.69	87.45	33.12	56.81	30.09	59.28	22.65	63.3	19.59	70.23	29.82	30.43
	Pre-Post			3.67	2.15	-0.63	4.68	2.17	0.34	0.9	0.81	0.73	0.46	0.1	-0.27	6.03	-6.03	9.45	-9.45	-1.06	0.48	2.06	-2.07	-0.06	0.06	-2.03	-4.53	-3.98	4.01	0.13	-2.04	8.99	-8.96	10.94	-10.41	-11.29	10.26	-4.21	4.33	0.14	0.67
Mohamed,Doaa,A	post	19850728	20170813	2.87	3.11	3.34	1.52	3.3	5.08	9.46	10.88	12.3	12.41	13.25	14.09	0.95	89.06	7.48	82.52	7.6	82.4	4.71	85.28	8.78	81.22	19.28	69.51	8.1	78.91	0.11	85.28	9.75	76.52	20.3	61.82	10.71	67.63	6.3	83.36	28.66	28.92
Doaa Ahmed MOHAMED	pre		20161025	9.73	6.21	2.68	9.19	5.99	2.79	11.9	12	12.11	12.13	12.57	13.01	14.2	75.8	13.79	76.21	-1	89.42	2.5	87.51	4.38	85.62	20.68	65.76	1.32	88.56	6.55	82.99	35.31	54.27	36.49	52.89	3.81	69.43	2.12	85.63	28.85	28.62
	Pre-Post			6.86	3.1	-0.66	7.67	2.69	-2.29	2.44	1.12	-0.19	-0.28	-0.68	-1.08	13.25	-13.26	6.31	-6.31	-8.6	7.02	-2.21	2.23	-4.4	4.4	1.4	-3.75	-6.78	9.65	6.44	-2.29	25.56	-22.25	16.19	-8.93	-6.9	2.2	-4.18	2.27	0.19	-0.3
eman abdsalm	pre			11.53	6.5	1.47	10.27	4.37	1.52	9.04	10.76	12.49	11.22	11.65	12.88	24.3	60.4	30.49	70.56	11.33	78.67	5.5	84.5	24.46	65.54	4.56	64.34	4.95	77.65	3.54	83.46	46.61	43.37	43.72	45.66	11.38	76.89	15.65	75.23	21.89	23.25
Eman Abdelsalam	post		20180311	6.28	5.05	3.82	3.13	1.22	0.68	8.38	10.64	12.91	10.73	12.12	13.5	13.34	70.65	20.48	80	14.42	75.58	8.81	81.19	14.66	75.34	10.72	71.24	1.97	75.45	5.89	79.41	30.35	58.6	16.99	72.98	6.33	81.01	19.87	69.57	21.86	22.6
	Pre-Post			5.25	1.45	-2.35	7.14	3.15	0.84	0.66	0.12	-0.42	0.49	-0.47	-0.62	10.96	-10.25	10.01	-9.44	-3.09	3.09	-3.31	3.31	9.8	-9.8	-6.16	-6.9	2.98	2.2	-2.35	4.05	16.26	-15.23	26.73	-27.32	5.05	-4.12	-4.22	5.66	0.03	0.65
eman fathy	pre	19940114	20170709	9.93	3.4	3.14	7.04	1.68	3.68	12.57	13.2	13.82	13.29	14.13	14.98	30.12	59.88	24.36	65.64	3.46	86.54	4.85	85.15	5.63	84.37	4.96	65.25	4.97	83.94	8.71	80.05	33.6	53.86	15.82	71.79	10.23	79.34	23.97	62.67	26.15	26.06
Eman Fathy	post		20180218	6.53	2.72	1.09	2.22	0.23	1.76	11.23	13.05	14.88	14.01	14.69	15.36	17.31	72.69	9.48	80.52	10.45	79.55	3.99	86.01	16.28	73.72	9.62	68.51	3.36	79.03	8.62	80.51	9.84	79.32	18.65	71.18	10.93	77.81	36.3	53.7	26.57	25.57
	Pre-Post			3.4	0.68	2.05	4.82	1.45	1.92	1.34	0.15	-1.06	-0.72	-0.56	-0.38	12.81	-12.81	14.88	-14.88	-6.99	6.99	0.86	-0.86	-10.65	10.65	-4.66	-3.26	1.61	4.91	0.09	-0.46	23.76	-25.46	-2.83	0.61	-0.7	1.53	-12.33	8.97	-0.42	0.49
esraa youssef	pre	19980823		7.48	1.68	4.13	8.5	1.65	5.2	14.56	15.3	16.04	13.37	14.81	16.25	21.48	68.52	26.94	63.06	4.05	85.95	7.85	82.15	4.07	85.93	11.87	61.19	14.59	74.87	0.34	82.15	40.67	49.28	36.61	53.27	16.93	70.68	7.96	79.76	31.76	30.76
Essra Yosef	post		20180306	3.61	0.71	2.18	4.78	0.54	3.69	14.07	14.79	15.51	12.91	15.11	17.31	10.88	79.12	17.23	72.77	4.09	85.91	11.78	78.22	2.24	87.77	17.72	66	18.05	71.5	0.01	78.22	35.5	53.92	27.99	59.17	22.34	57.16	2.67	78.06	30.71	29.91
	Pre-Post			3.87	0.97	1.95	3.72	1.11	1.51	0.49	0.51	0.53	0.46	-0.3	-1.06	10.6	-10.6	9.71	-9.71	-0.04	0.04	-3.93	3.93	1.83	-1.84	-5.85	-4.81	-3.46	3.37	0.33	3.93	5.17	-4.64	8.62	-5.9	-5.41	13.52	5.29	1.7	1.05	0.85
Fatma Ahmed MOHAMED	pre		20161120	6.4	3.48	0.57	7.79	4.49	3.09	13.65	13.84	14.04	13.6	14.03	14.47	14.36	75.64	16.04	73.96	1.3	88.7	2.95	87.06	14.29	75.71	11.72	70.48	4.36	85.45	4.91	84.28	44.59	45.37	35.2	54.7	2.09	81.03	12.33	70.59	24.21	24.32
Fatma Ahmed MOHAMED	post	19821111	20170722	2.9	2.96	3.01	3.14	2.97	2.79	11.38	11.66	11.95	12.68	13.42	14.16	0.27	89.72	0.86	89.14	1.87	88.13	5.02	84.98	15.51	74.49	15.8	74.18	4.23	85.37	10.09	78.74	36.97	52.97	23.2	63.96	9.47	77.56	7.78	76.85	24.09	23.75
	Pre- Post			3.5	0.52	-2.44	4.65	1.52	0.3	2.27	2.18	2.09	0.92	0.61	0.31	14.09	-14.08	15.18	-15.18	-0.57	0.57	-2.07	2.08	-1.22	1.22	-4.08	-3.7	0.13	0.08	-5.18	5.54	7.62	-7.6	12	-9.26	-7.38	3.47	4.55	-6.26	0.12	0.57
Hagar Ahmed ALI	post		20161113	4.86	3.88	2.9	4.79	2.94	1.08	12.62	11.38	10.14	15.2	13.69	12.17	4.72	85.28	8.65	81.35	8.13	81.87	10.02	79.98	18.22	71.78	15.18	72.72	1.87	81.66	7.9	77.27	23.49	65.83	13.21	76.59	12.27	74.78	9.76	75.55	25.14	25.55
Hagar Ahmed ALI	pre		20160314	7.85	5.7	3.54	8.4	5.24	2.07	14.73	12.8	10.87	14.79	12.88	10.96	9.74	80.26	14.13	75.87	12.38	77.62	12.3	77.7	8.25	81.75	11.39	72.13	1.12	77.57	3.64	77.18	31.16	58.69	29.95	58.99	5.56	77.16	7.92	73.85	25.74	26.43
	Pre- Post			2.99	1.82	0.64	3.61	2.3	0.99	2.11	1.42	0.73	-0.41	-0.81	-1.21	5.02	-5.02	5.48	-5.48	4.25	-4.25	2.28	-2.28	-9.97	9.97	-3.79	-0.59	-0.75	-4.09	-4.26	-0.09	7.67	-7.14	16.74	-17.6	-6.71	2.38	-1.84	-1.7	0.6	0.88
Hanaa Ahmed Mohamed	post	19911014		0.83	1.27	3.37	0.57	1.64	2.7	13.15	12.62	12.09	11.73	11.44	11.15	10.38	79.62	5.26	84.74	2.98	87.02	1.52	88.48	16.03	73.97	17.52	71.8	12.95	76.72	0.09	88.48	24.67	59.29	37.46	43.21	10.63	65.53	20.76	69.13	24.24	24.37
Hanaa Ahmed MOHAMED	pre		20161120	6.18	4.81	3.45	6.98	4.16	1.34	12.65	12.49	12.33	11.69	11.6	11.51	6.36	83.64	13.35	76.65	0.9	89.1	0	89.52	12.99	77.01	11.64	72.56	3.17	86.7	2.95	87.01	34.27	54.86	35.55	51.4	8.35	75.73	19.47	70.52	25.25	24.9
	Pre- Post			5.35	3.54	0.08	6.41	2.52	-1.36	-0.5	-0.13	0.24	-0.04	0.16	0.36	-4.02	4.02	8.09	-8.09	-2.08	2.08	-1.52	1.04	-3.04	3.04	-5.88	0.76	-9.78	9.98	2.86	-1.47	9.6	-4.43	-1.91	8.19	-2.28	10.2	-1.29	1.39	1.01	0.53
heba	post	19821012	20170703	0.05	1.01	2.06	2.27	1.22	0.16	13.61	12.99	12.38	16.63	15.89	15.16	4.51	85.49	4.51	85.49	3.44	86.56	4.08	85.92	11.38	78.62	14.14	75.22	4.39	84.43	10.63	78.62	36.97	50.64	23.47	63.87	13.69	72.87	19.76	64.65	27.4	27.64
heba	pre		20160926	5.66	2.41	0.83	3.93	1.69	0.54	12.96	12.44	11.91	16.28	16.14	15.99	13.92	76.08	9.47	80.52	2.9	87.09	0	89.19	11.3	78.7	10.86	75.73	0.87	86.97	7.41	82.54	40.65	48.75	42.01	47.4	17.76	68.56	9.55	72.22	27.5	27.61
	Pre- Post			5.61	1.4	-1.23	1.66	0.47	0.38	-0.65	-0.55	-0.47	-0.35	0.25	0.83	9.41	-9.41	4.96	-4.97	-0.54	0.53	-4.08	3.27	-0.08	0.08	-3.28	0.51	-3.52	2.54	-3.22	3.92	3.68	-1.89	18.54	-16.47	4.07	-4.31	-10.21	7.57	0.1	-0.03
Maryiam Ashraf ABDALLAH	post	20180106	20180117	7.61	4.86	2.1	8.09	4.14	0.19	8.3	9.89	11.48	7.77	9.75	11.73	13.26	76.74	21.54	68.46	9.56	80.44	11.87	78.13	20.23	69.77	28.67	56.01	11.52	75.07	7.02	76.24	8.29	81.49	22.8	64.79	14.32	72.67	15.94	64.45	25.5	24.13
Maryiam Ashraf ABDALLAH	pre	19971006	20170722	13.48	7.55	1.61	13.05	6.71	0.37	9.22	9.61	10	10.03	10.63	11.24	26.84	63.16	30.66	59.34	2.29	87.71	4.27	85.73	15.36	74.64	19.36	63.88	4.21	85.21	12.04	77.24	37.43	52.49	24.53	64.95	6.67	67.23	5.78	78.65	27.05	25.97
	Pre- Post			5.87	2.69	-0.49	4.96	2.57	0.18	0.92	-0.28	-1.48	2.26	0.88	-0.49	13.58	-13.58	9.12	-9.12	-7.27	7.27	-7.6	7.6	-4.87	4.87	-9.31	7.87	-7.31	10.14	5.02	1	6	-29	1.73	0.16	-7.65	-5.44	-10.16	14.2	1.55	1.84
Nashwa Ashraf HASSAN	post	19961209	20180201	0.38	0.65	0.92	0.44	0.24	0.04	13.26	11.96	10.67	15.88	15.03	14.17	1.53	88.47	6.67	81.76	10.01	79.99	5.38	84.62	27.38	62.62	18.69	70.01	5.11	78.78	2.67	84	10.73	75.89	7.52	78	35.56	49.65	13.56	69.43	22.74	21.97
Nashwa Ashraf HASSAN	pre	19961209		5.67	1.87	1.93	5.62	1.96	1.69	15.5	13.87	12.25	16	15.16	14.32	12.26	77.98	17.01	71.69	10.09	79.91	5.11	84.89	18.03	71.97	12.35	76.84	9.63	76.08	1.57	84.65	18.52	71.44	19.87	70.03	27.67	55.67	18.62	62.32	23.73	23.41
	Pre- Post			5.29	1.22	1.01	5.18	1.72	1.65	2.24	1.91	1.58	0.12	0.13	0.15	10.73	-10.49	10.34	-10.07	0.08	-0.08	-0.27	0.27	-9.35	9.35	-6.34	6.83	4.52	-2.7	-1.1	0.65	7.79	-4.45	12.35	-7.97	-7.89	6.02	5.06	-7.11	0.99	1.44
Rasha Mohamed ABDALLAH	post		20180128	0.85	0.36	1.56	0.29	0.07	0.14	13.27	12.28	11.28	15.04	14.35	13.66	5.62	84.38	1.03	88.96	6.37	83.63	4.59	85.41	15.75	74.25	17.51	72.46	4.44	82.24	0.79	85.35	25	62.02	34.27	50.53	14.54	70.94	10.33	73.29	25.62	25.06
Rasha Mohamed ABDALLAH	pre	19861204		5.87	2.94	0.01	4.22	1.66	0.89	15.57	13.86	12.15	15.44	14.63	13.82	12.42	77.58	11.08	78.92	11.11	78.89	5.51	84.49	4.39	85.61	9.96	75.27	5.95	77.42	1.04	84.39	40.26	49.17	35.8	48.07	5.21	67.98	0.84	75.86	27.29	27.02
	Pre- Post			5.02	2.58	-1.55	3.93	1.59	0.75	2.3	1.58	0.87	0.4	0.28	0.16	6.8	-6.8	10.05	-10.04	4.74	-4.74	0.92	-0.92	-11.36	11.36	-7.55	2.81	1.51	-4.82	0.25	-0.96	15.26	-12.85	1.53	-2.46	-9.33	-2.96	-9.49	2.57	1.67	1.96
Sara Hamdy Ali	post	19981123	20180328	5.64	4.83	4.02	5.1	4.34	3.58	10.05	9.47	8.89	9.81	9.88	9.96	3.99	86.02	3.62	86.38	3.75	86.25	0	89.54	21.22	68.78	18.01	71.68	3.42	84.93	10.38	79.61	14.02	74.89	17.01	72.2	28.36	59.62	8.74	81.18	25.03	25.34
Sara Hamdy Ali	pre	19981123		11.73	7.29	2.84	9.76	6.38	3	10.17	8.65	7.14	9.93	9.47	9.01	19.55	70.45	15.75	74.25	9.88	80.12	2.72	87.28	11.08	78.92	16.35	72.87	5.35	78.77	3.96	85.2	31.1	58.37	18.21	71.42	27	62.05	5.95	82.98	27.01	25.86
				6.09	2.46	-1.18	4.66	2.04	-0.58	0.12	-0.82	-1.75	0.12	-0.41	-0.95	15.56	-15.57	12.13	-12.13	6.13	-6.13	2.72	-2.26	-10.14	10.14	-1.66	1.19	1.93	-6.16	-6.42	5.59	17.08	-16.52	1.2	-0.78	-1.36	2.43	-2.79	1.8	1.98	0.52
Sherein Ahmed Mohamed	post	19911022	20170725	1.02	0.15	0.72	1.62	0.02	1.66	13.78	13.67	13.56	13.45	12.42	11.39	4.06	85.94	8.29	81.71	0	89.37	6.48	83.52	12.01	77.99	16.49	71.74	11.8	78.19	11.58	76.75	18.06	69.2	26.76	61.35	5.89	74.8	15.75	72.12	25.1	23.72
Sherein Ahmed MOHAMED	pre		20161120	3.68	0.97	1.74	6.7	2.39	1.92	17.18	16.2	15.22	14.76	13.53	12.3	12.32	77.68	20.19	69.81	5.77	84.23	7.14	82.86	2.72	87.28	15.69	69.14	14.09	74.79	1.24	82.76	31.58	58.29	45.45	42.53	1.97	71.76	16.78	68.42	25.44	25.81
	Pre- Post			2.66	0.82	1.02	5.08	2.37	0.26	3.4	2.53	1.66	1.31	1.11	0.91	8.26	-8.26	11.9	-11.9	5.77	-5.14	0.66	-0.66	-9.29	9.29	-0.8	-2.6	2.29	-3.4	-10.34	6.01	13.52	-10.91	18.69	-18.82	-3.92	-3.04	1.03	-3.7	0.34	2.09
Soaad Mhmud MANSOUR	pre		20160427	8.76	4.7	0.64	7.43	3.74	1.99	13.83	13.88	13.92	14.59	15.79	16.99	21.02	68.98	19.28	70.72	0	89.69	8.77	81.23	11.57	78.43	11.4	68.02	11.49	78.51	13.48	73.96	23.97	64.88	31.88	56.58	3.75	83.95	7.87	77.08	23.05	22.74
Soaad Mhmud MANSOUR	post		20161110	4.96	3.61	2.26	3.05	2.13	1.22	11.1	12.91	14.73	13.24	15.22	17.2	7.47	82.53	4.89	85.11	12.86	77.14	14.62	75.38	18.85	71.15	15.33	65.09	3.12	76.77	10.67	71.97	-1	87.76	14.95	74.94	2.38	79.6	12.35	76.83	21.9	22.25
	Pre- Post			3.8	1.09	-1.62	4.38	1.61	0.77	2.73	0.97	-0.81	1.35	0.57	-0.21	13.55	-13.55	14.39	-14.39	-12.86	12.55	-5.85	5.85	-7.28	7.28	-3.93	2.93	8.37	1.74	2.81	1.99	24.97	-22.88	16.93	-18.36	1.37	4.35	-4.48	0.25	1.15	0.49

## Sheet: Sheet2
		Dist 3			Dist 6			tip 3		tip 6		torque 3		torque 6		Rotation 3		Rotation 6		Length 3
Name	ID	UR3tip-FP	UR3Center-FP	UR3apex-FP	UR6tip-FP	UR6Center-FP	UR6apex-FP	UR3-tipping	UR3-tipping-horizontal plane	UR6-tipping- FP	UR6-tipping - HP	UR3-torque/ MSP	UR3 torque- Horizontal plane	UR6torque - MSP	UR6torque - HP	UR3Rotation - MSP	UR3Rotation - FP	UR6Rotation - MSP	UR6Rotation - FP	UR3-Root Length
	Pre-Post	5.53	2.31	0.12	0.94	0.96	0.98	13.35	-13.35	0.15	-0.14	-1.75	1.75	2.05	-1.77	18.46	-18.92	-9.14	7.8	1.23
	Pre-Post	3.67	2.15	-0.63	0.9	0.81	0.73	6.03	-6.03	-1.06	0.48	-0.06	0.06	-3.98	4.01	8.99	-8.96	-15.12	14.29	0.14
	Pre-Post	6.86	3.1	-0.66	2.44	1.12	-0.19	13.25	-13.26	#VALUE!	7.02	-4.4	4.4	-6.78	9.65	25.56	-22.25	-20.25	17.35	0.19
	Pre-Post	5.25	1.45	-2.35	0.66	0.12	-0.42	22.93	-22.93	-3.09	3.09	9.8	-9.8	2.98	2.2	16.26	-15.23	29.93	-24.71	0.03
	Pre-Post	3.4	0.68	2.05	1.34	0.15	-1.06	12.81	-12.81	-6.99	6.99	-10.65	10.65	1.61	4.91	23.76	-25.46	-0.7	1.53	-0.42
	Pre-Post	3.87	0.97	1.95	0.49	0.51	0.53	10.6	-10.6	-0.04	0.04	1.83	-1.84	-3.46	3.37	5.17	-4.64	-15.78	13.52	1.05
	Pre- Post	3.5	0.52	-2.44	2.27	2.18	2.09	14.09	-14.08	-0.57	0.57	-1.22	1.22	0.13	0.08	7.62	-7.6	-9.38	3.47	0.12
	Pre- Post	2.99	1.82	0.64	2.11	1.42	0.73	5.02	-5.02	4.25	-4.25	-9.97	9.97	-0.75	-4.09	7.67	-7.14	-8.84	2.38	0.6
	Pre- Post	5.35	3.54	0.08	-0.5	-0.13	0.24	-4.02	4.02	-2.08	2.08	-3.04	3.04	-9.78	9.98	9.6	-4.43	-2.28	12.77	1.01
	Pre- Post	5.61	1.4	-1.23	-0.65	-0.55	-0.47	9.41	-9.41	-0.54	0.53	-0.08	0.08	-3.52	2.54	3.68	-1.89	6.7	-7.85	0.1
	Pre- Post	5.87	2.69	-0.49	0.92	-0.28	-1.48	13.58	-13.58	-7.27	7.27	-4.87	4.87	-7.31	10.14	29.14	-29	-12.68	-7.04	1.55
	Pre- Post	5.29	1.22	1.01	2.24	1.91	1.58	18.04	-18.04	0.08	-0.08	-9.35	9.35	4.52	-2.7	7.79	-4.45	-18.72	18.59	0.99
	Pre- Post	5.02	2.58	-1.55	2.3	1.58	0.87	6.8	-6.8	4.74	-4.74	-11.36	11.36	1.51	-4.82	15.26	-12.85	-13.01	-2.96	1.67
	Pre- Post	6.09	2.46	-1.18	0.12	-0.82	-1.75	15.56	-15.57	6.13	-6.13	-10.14	10.14	1.93	-6.16	17.08	-16.52	-1.36	2.43	1.98
	Pre- Post	2.66	0.82	1.02	3.4	2.53	1.66	8.26	-8.26	5.77	-5.14	-9.29	9.29	2.29	-3.4	13.52	-10.91	-9.11	-4.36	0.34
	Pre- Post	3.8	1.09	-1.62	2.73	0.97	-0.81	13.55	-13.55	-12.86	12.55	-7.28	7.28	8.37	1.74	#VALUE!	-22.88	1.37	4.35	1.15
		UL3tip-FP	UL3Center-FP	UL3apex-FP	UL6tip-FP	UL6center-FP	UL6apex-FP	UL3-tipping	UL3tipping-Horizontal plane	UL6tipping- FP	UL6tipping - Horizontal Plane	UL3 torque - MSP	UL3torque- HP	UL6torque - MSP	UL6torque - HP	UL3Rotation - MSP	UL3Rotation - FP	UL6Rotation - MSP	UL6Rotation - FP	UL3-Root Length
		4.93	1.54	1.83	0.13	0.64	1.15	13.59	-13.59	-3.22	3.22	-11.55	-7.46	-1.74	3.32	37.59	-37.67	12.2	-16.46	1.66
		4.68	2.17	0.34	0.46	0.1	-0.27	9.45	-9.45	2.06	-2.07	-2.03	-7.36	0.13	-2.04	10.94	-10.41	-4.21	4.33	0.67
		7.67	2.69	-2.29	-0.28	-0.68	-1.08	6.31	-6.31	-2.21	2.23	1.4	-3.75	6.44	-2.29	16.19	-8.93	-4.18	2.27	-0.3
		7.14	3.15	0.84	0.49	-0.47	-0.62	20.48	-20.49	-3.31	3.31	-14.72	-13.73	-2.35	4.05	26.73	-27.32	-9.53	9.78	0.65
		4.82	1.45	1.92	-0.72	-0.56	-0.38	14.88	-14.88	0.86	-0.86	-14.66	-3.26	0.09	-0.46	-2.83	0.61	-12.33	11.97	0.49
		3.72	1.11	1.51	0.46	-0.3	-1.06	9.71	-9.71	-3.93	3.93	-5.85	-4.81	0.33	3.93	8.62	-5.9	7.1	1.7	0.85
		4.65	1.52	-1.59	0.92	0.61	0.31	15.18	-15.18	-2.07	2.08	-4.08	-3.7	-5.18	5.54	12	-9.26	8.31	-6.26	0.57
		3.61	2.3	0.99	-0.41	-0.81	-1.21	5.48	-5.48	2.28	-2.28	-3.79	-0.59	-4.26	-0.09	16.74	-17.6	5.15	-1.7	0.88
		6.41	2.52	-1.36	-0.04	0.16	0.36	8.09	-8.09	-1.52	1.04	-5.88	0.76	2.86	-1.47	-1.91	8.19	2.94	1.39	0.53
		1.66	0.47	0.38	-0.35	0.25	0.83	4.96	-4.97	-4.08	3.27	-3.28	0.51	-3.22	3.92	18.54	-16.47	-24.04	23.02	-0.03
		4.96	2.57	0.18	2.26	0.88	-0.49	9.12	-9.12	-7.6	7.6	-9.31	-0.58	5.02	1	1.73	0.16	-20.63	25.57	1.84
		5.18	1.72	1.65	0.12	0.13	0.15	17.22	-17.22	-0.27	0.27	-11.74	-0.71	-1.1	0.65	12.35	-7.97	5.06	-9.92	1.44
		3.93	1.59	0.75	0.4	0.28	0.16	10.05	-10.04	0.92	-0.92	-7.55	2.81	0.25	-0.96	1.53	-2.46	-12.49	2.57	1.96
		4.66	2.04	-0.58	0.12	-0.41	-0.95	12.13	-12.13	2.72	-2.26	-1.66	-3.82	-6.42	5.59	1.2	-0.78	-2.79	1.8	0.52
		5.08	2.37	0.26	1.31	1.11	0.91	11.9	-11.9	0.66	-0.66	-0.8	-6.57	-10.34	6.01	18.69	-18.82	1.03	-3.7	2.09
		4.38	1.61	-1.17	1.35	0.57	-0.21	14.39	-14.39	-5.85	5.85	-3.93	-5.95	2.81	1.99	16.93	-18.36	7.78	0.25	0.49
