# Supplementary material for: Effectiveness of low frequency vibration on the rate of canine retraction:A randomized controlled clinical trial
Source: Research Square preprint supplement (doi:10.21203/rs.3.rs-3347770/v1), 2023-10-17
Supplement: Supplementary file 2 [file 84f3ad14dfb877b3cefc9141.xlsx]

## Sheet: Sheet1
Name	ID	Birthday	Scan Date	UR3-FP	UR3Center-FP	UR3apex-FP	UL3tip-FP	UL3Center-FP	UL3apex-FP	UR6tip-FP	UR6Center-FP	UR6apex-FP	UL6tip-FP	UL6center-FP	UL6apex-FP	UR3-tipping/hp	UR3-tipping-FP	UL3-tipping/ HP	UL3tipping/FP	UR6-tipping- FP	UR6-tipping -	UL6tipping- FP	UL6tipping - Horizontal Plane	UR3-torque/ MSP	UR3 torque- Horizontal plane	UL3 torque - MSP	UL3torque- HP	UR6torque - MSP	UR6torque - HP	UL6torque - MSP	UL6torque - HP	UR3Rotation - MSP	UR3Rotation - FP	UL3Rotation - MSP	UL3Rotation - FP	UR6Rotation - MSP	UR6Rotation - FP	UL6Rotation - MSP	UL6Rotation - FP	UR3-Root Length	UL3-Root Length
Ali ABDALLAH ALI	pre		20160414	10.32	6.11	1.89	13.31	7.6	1.89	11.77	12.58	13.39	8.45	8.93	9.42	16.85	73.15	21.9	68.1	4.32	85.68	2.59	87.41	18.98	75.87	12.01	65.54	8.96	80.06	2.67	86.28	30.44	58.33	48.58	41.4	18.87	70.76	20.01	72.31	29.36	31.21
Ali ABDALLAH ALI	post		20161016	1.93	3.2	4.46	6.18	3.61	1.03	10.73	11.8	12.87	10.35	10.86	11.37	5.31	84.69	9.83	80.17	5.69	84.31	2.78	87.22	24.1	65.9	14.62	63.98	5.68	81.96	10.44	79.2	4.37	80.84	7.42	80.51	17.87	71.8	19.25	70.73	29.86	31.17
		Pre-Post		8.39	2.91	-2.57	7.13	3.99	0.86	1.04	0.78	0.52	-1.9	-1.93	-1.95	11.54	-11.54	12.07	-12.07	-1.37	1.37	-0.19	0.19	-5.12	9.97	-2.61	1.56	3.28	-1.9	-7.77	7.08	26.07	-22.51	41.16	-39.11	1	-1.04	0.76	1.58	-0.5	0.04
Asmaa Khaled AHMED	post	19950506	20170715	1.49	0	1.48	2.4	1.14	0.12	13.06	13.91	14.77	15.66	16.17	16.69	6.46	83.55	5.44	84.56	4.57	85.43	2.89	87.11	13.66	76.34	13.18	75.82	0.81	85.36	7.17	82.27	22.6	66.97	15.09	70.54	6.77	82.99	11.4	74.85	27.15	27.29
Asmaa Khaled AHMED	pre		20160731	4.85	1.93	0.98	3.46	1.79	0.13	15.23	15.33	15.43	16.52	16.84	17.15	12.18	77.82	7.1	82.9	0	89.47	1.76	88.24	6.66	83.34	4.44	81.65	0.35	89.36	7.73	82.07	30.38	59.29	15.53	73.62	17.4	79.98	14.43	69.5	27.84	27.01
		Pre-Post		3.36	1.93	-0.5	1.06	0.65	0.01	2.17	1.42	0.66	0.86	0.67	0.46	5.72	-5.73	1.66	-1.66	-4.57	4.04	-1.13	1.13	-7	7	-8.74	5.83	-0.46	4	0.56	-0.2	7.78	-7.68	0.44	3.08	10.63	-3.01	3.03	-5.35	0.69	-0.28
doaa gamae	post			2.82	1.77	0.72	1.93	2.03	2.13	9.51	9.62	9.74	10.53	9.51	8.84	5.08	84.92	0.6	89.4	0.8	89.19	5.6	84.4	4.9	85.1	18.98	57.54	15.51	74.47	4.85	82.6	27.94	61.81	21.3	62.9	22.56	74.28	7.96	73.43	23.81	22.57
doaa gamae	pre	19970213	20170330	7.35	4.49	1.63	6.94	4.71	2.48	11.2	10.56	9.93	10.43	9.87	9.31	14.98	75.02	12.2	77.8	4.4	85.6	3.6	86.4	4.73	85.27	11.48	65.98	10.88	78.27	0.42	86.37	39.14	50.83	25.89	63.99	24.1	65.9	13.65	71.42	22.18	21.53
		Pre-Post		4.53	2.72	0.91	5.01	2.68	0.35	1.69	0.94	0.19	-0.1	0.36	0.47	9.9	-9.9	11.6	-11.6	3.6	-3.59	-2	2	-0.17	0.17	-7.5	8.44	-4.63	3.8	-4.43	3.77	11.2	-10.98	4.59	1.09	1.54	-8.38	5.69	-2.01	-1.63	-1.04
Eman Ashraf Koraney	pre	19981218	20170717	8.61	2.52	3.57	10.24	6.14	2.05	15.02	13.83	12.65	12.64	10.93	9.22	24.15	65.85	17.25	72.75	6.86	83.14	9.54	80.46	8.5	64.65	1.3	72.71	5.69	81.1	14.36	72.82	32.09	55.25	29.85	60.04	19.36	67.88	18.65	68.16	30.05	27.63
Eman Ashraf Korany	post	19981219	20180131	2.02	2.39	2.76	6.48	4.68	2.88	13.12	12.9	12.68	10.85	10.08	9.32	1.86	88.13	7.66	82.34	1.28	88.72	4.42	85.58	16.75	58.9	7.77	65.87	3.83	85.96	17.78	71.69	4.9	78.35	12.97	75.55	13.87	72.65	11.76	76.41	26.63	27.22
		Pre-Post		6.59	0.13	0.81	3.76	1.46	-0.83	1.9	0.93	-0.03	1.79	0.85	-0.1	22.29	-22.28	9.59	-9.59	5.58	-5.58	5.12	-5.12	-8.25	5.75	-6.47	6.84	1.86	-4.86	-3.42	1.13	27.19	-23.1	16.88	-15.51	5.49	-4.77	6.89	-8.25	3.42	0.41
esraa omar	pre		20161026	7.52	4.51	1.51	10.4	5.2	0	12.33	12.65	12.97	12.85	12.9	12.95	14.09	75.91	22.84	67.16	1.73	88.27	0	89.76	12.72	77.28	7.21	66.26	1.18	87.91	6.79	83.2	20.69	67.55	30.64	59.25	13.65	76.58	22.44	67.52	25.3	26.98
esraa omar	post	19950101	20170702	2.02	2	1.99	1.94	1.5	1.06	10.89	12.21	13.54	12.53	13.49	14.45	0	89.93	2.04	87.96	7.16	82.84	5.22	84.78	17.02	72.98	14.44	75.43	0.04	82.84	10.44	78.34	11.54	71.55	5.96	75.68	11.34	77.64	20.3	69.34	25.57	25.51
		Pre-Post		5.5	2.51	-0.48	8.46	3.7	-1.06	1.44	0.44	-0.57	0.32	-0.59	-1.5	14.09	-14.02	20.8	-20.8	-5.43	5.43	-5.22	4.98	-4.3	4.3	-7.23	-9.17	1.14	5.07	-3.65	4.86	9.15	-4	24.68	-16.43	2.31	-1.06	2.14	-1.82	-0.27	1.47
Fatma Ahmed ABDELRAHMAN	post	20020820	20170703	0.88	0.03	0.95	4.25	1.72	0.81	14.34	14.45	14.57	11.85	12.62	13.4	4.16	85.84	11.38	78.62	-1.#J	89.28	4.77	85.23	23.9	66.1	19.46	67.87	8.95	81.02	8.98	79.85	8.93	72.78	19.29	68.92	7.76	81.74	12.7	76.34	27.63	27.15
Fatma Ahmed ABDELRAHMAN	pre		20161009	5.81	2.76	0.29	8.1	3.63	0.84	15.82	15.29	14.77	13.44	13.37	13.3	13.48	76.52	19.2	70.8	3.16	86.85	-1.#J	89.59	14.47	75.53	13.68	66.98	5.51	83.66	6.25	83.74	31.47	57.94	41.02	47.64	13.98	76.02	14.65	77.76	26.97	27.88
		Pre-Post		4.93	2.73	-0.66	3.85	1.91	0.03	1.48	0.84	0.2	1.59	0.75	-0.1	9.32	-9.32	7.82	-7.82	#VALUE!	-2.43	#VALUE!	4.36	-9.43	9.43	-5.78	-0.89	-3.44	2.64	-2.73	3.89	22.54	-14.84	21.73	-21.28	6.22	-5.72	1.95	1.42	-0.66	0.73
Anwar,Hadeir,S	pre	19970125	20170806	9.24	5.1	3.67	9.68	3.61	2.45	13.33	13.35	13.37	13.79	14.67	15.56	18.39	71.61	29.13	60.87	0	89.81	6.05	83.95	8.88	81.12	14.47	58.44	6.03	83.96	10.09	78.25	41.16	48.65	34.07	54.82	6.44	82.65	6.54	79.16	26.56	25.54
Anwar,Hadeir,S	post	19970125	20180121	2.4	2.26	2.12	5.18	1.74	1.7	12.31	12.89	13.47	11.92	12.94	13.97	0.63	89.35	17.11	72.89	4.13	85.87	7.08	82.92	13.3	76.7	21.98	59.7	10.55	78.68	8.08	79.27	8.87	80.32	10.3	76.06	8.65	79.65	2.08	80.54	26.04	25.88
		Pre-Post		6.84	2.84	1.55	4.5	1.87	0.75	1.02	0.46	-0.1	1.87	1.73	1.59	17.76	-17.74	12.02	-12.02	-4.13	3.94	-1.03	1.03	-4.42	4.42	-7.51	-1.26	-4.52	5.28	2.01	-1.02	32.29	-31.67	23.77	-21.24	-2.21	3	4.46	-1.38	0.52	-0.34
Manar Khaled RADY	pre		20160413	4.52	1.23	2.06	3.2	0.56	2.09	16.44	15.15	13.87	18	16.38	14.77	12.5	77.5	10.43	79.57	7.04	82.96	8.92	81.07	4.74	85.26	13.43	73.22	13.26	75.01	8.71	77.55	24.05	64.64	22.46	67.27	20.84	72.23	12.65	68.87	30.52	30.03
Manar Khaled RADY	post			0.07	0.17	0.28	0.24	0.14	0.52	14.15	13.6	13.06	15.58	14.81	14.65	0.4	14.78	14.78	75.22	2.95	87.05	2.62	87.37	6.18	83.82	4.87	69.87	13.5	76.18	8.91	80.72	0	83.74	22.23	65.75	18.78	76.69	7.65	75.84	29.57	30.32
		Pre-Post		4.45	1.06	1.78	2.96	0.42	1.57	2.29	1.55	0.81	2.42	1.57	0.12	12.1	62.72	-4.35	4.35	4.09	-4.09	6.3	-6.3	-1.44	1.44	8.56	3.35	-0.24	-1.17	-0.2	-3.17	24.05	-19.1	0.23	1.52	2.06	-4.46	5	-6.97	0.95	-0.29
Marwa Mostafa AHMED	post	20000302	20170711	2.57	1.78	0.98	5.4	3.1	0.79	10.7	10.2	9.7	11.58	11.18	10.78	3.58	86.42	9.43	80.57	2.76	87.24	2.23	87.77	18.7	71.3	9.57	76.68	1.06	87.04	7.11	82.55	8.1	80.35	23.68	66.29	18.9	67.65	11.51	78.46	27	28.52
Marwa Mostafa AHMED	pre		20161024	10.35	5.1	1	10.97	5.69	0.42	10.81	10.58	10.35	10.29	10.32	10.35	21.55	68.45	21.16	68.84	1.26	88.74	0	89.87	8.93	81.07	10.48	78.98	7.15	82.74	2	88	31.18	58.68	42.69	47.28	21.71	68.19	14.04	75.6	28.91	29.66
		Pre-Post		7.78	3.32	0.02	5.57	2.59	-0.37	0.11	0.38	0.65	-1.29	-0.86	-0.43	17.97	-17.97	11.73	-11.73	-1.5	1.5	-2.23	2.1	-9.77	9.77	0.91	2.3	6.09	-4.3	-5.11	5.45	23.08	-21.67	19.01	-19.01	2.81	0.54	2.53	-2.86	1.91	1.14
Mena Mohamed FAYEZ	post		20161108	3.46	2.65	1.85	4.4	3.66	2.91	17.77	17.67	17.58	18.38	19.24	20.1	4.51	85.5	3.79	86.21	-1.#J	89.42	5.83	84.17	36.12	53.88	29.89	59.95	1.68	88.22	1.5	83.98	14.72	75.25	11.37	78.31	10.18	79.82	12.11	69.78	25.47	25.83
Mena Mohamed FAYEZ	pre	pre	20160425	3.96	0.64	2.69	2.83	1.17	5.16	18.79	18.29	17.8	19.6	20.02	20.45	16.09	73.91	19.09	70.91	3.03	86.97	2.73	87.27	28.98	59.65	20.14	63.24	4.85	84.28	3.56	85.51	34.84	55.14	28.51	61.31	13.24	76.48	12	70.65	26.27	25.84
		Pre-Post		0.5	-2.01	0.84	-1.57	-2.49	2.25	1.02	0.62	0.22	1.22	0.78	0.35	11.58	-11.59	15.3	-15.3	#VALUE!	-2.45	-3.1	3.1	-7.14	5.77	-9.75	3.29	3.17	-3.94	2.06	1.53	20.12	-20.11	17.14	-17	3.06	-3.34	-0.11	0.87	0.8	0.01
Mohamed Alaaeldein KAMAL	post		20161017	3.18	1.12	0.95	1.59	0.49	0.62	17.09	15.78	14.47	11.83	11.96	12.09	9.28	80.72	5.06	84.95	7.75	82.25	0.85	89.14	18.11	79.98	15.47	65.87	6.64	79.81	2.41	87.44	19.36	70.46	36.88	52.16	25.12	61.15	13.65	60.63	26.9	26.05
Mohamed Alaaeldein KAMAL	pre	pre	20160331	3.76	1.59	1.76	7.56	3.5	1.56	18.27	16.59	14.91	13.78	13.19	12.6	9.15	80.85	18.62	71.38	9.97	80.03	3.6	86.4	7.9	82.1	12.77	67.9	3.66	79.38	7.47	81.72	43.53	46.36	40.74	48.12	23.02	64.08	14.65	61.76	27.57	26.02
		Pre-Post		0.58	0.47	0.81	5.97	3.01	0.94	1.18	0.81	0.44	1.95	1.23	0.51	-0.13	0.13	13.56	-13.57	2.22	-2.22	2.75	-2.74	-10.21	2.12	-2.7	2.03	-2.98	-0.43	5.06	-5.72	24.17	-24.1	3.86	-4.04	-2.1	2.93	1	1.13	0.67	-0.03
Mostafa Amer FOUAD	post		20161113	1.05	0.87	0.68	0.54	0.73	0.91	15.88	17.19	18.51	15.27	16.8	18.32	0.88	89.11	0.85	89.14	8.76	81.24	10.13	79.87	10.34	79.66	11.18	78.78	9.51	77.09	10.72	75.29	4.08	83.72	17.54	67.39	14.15	70.65	19.39	70.57	24.58	24.96
Mostafa Amer FOUAD	pre		20160526	4.67	2.5	0.32	4.42	1.87	0.68	16.48	17.27	18.05	17.29	18.18	19.07	9.74	80.26	11.46	78.54	5.35	84.65	5.69	84.3	5.76	87.56	6.56	76.88	11.79	77.07	6.88	81.08	45.04	44.12	36.54	51.14	16.76	63.54	18.87	74.14	25.73	25.82
		Pre-Post		3.62	1.63	-0.36	3.88	1.14	-0.23	0.6	0.08	-0.46	2.02	1.38	0.75	8.86	-8.85	10.61	-10.6	-3.41	3.41	-4.44	4.43	-4.58	7.9	-4.62	-1.9	2.28	-0.02	-3.84	5.79	40.96	-39.6	19	-16.25	2.61	-7.11	-0.52	3.57	1.15	0.86
samyia eiweis	post		20171212	0.77	0.43	0.1	0.47	0.61	0.74	12.96	14.22	15.49	15.29	15.83	16.38	1.43	88.57	0.66	89.35	8.08	81.92	3.46	86.54	14.3	75.7	20.94	69.05	1.95	81.69	0.72	86.47	10.16	79.81	6.38	81.81	10.56	87.03	15.6	74.3	27.64	25.67
samyia eiweis	pre		20170613	5.25	1.99	1.27	6.11	1.72	2.67	14.9	14.75	14.61	15.94	15.99	16.03	13.38	76.63	18.38	71.62	0.92	89.08	0	89.73	9.74	80.26	8.96	69.81	1.53	88.21	4.81	85.19	25.36	63.05	26.6	62.57	13.24	79.34	13.48	76.25	28.59	28.16
		Pre-Post		4.48	1.56	1.17	5.64	1.11	1.93	1.94	0.53	-0.88	0.65	0.16	-0.35	11.95	-11.94	17.72	-17.73	-7.16	7.16	-3.46	3.19	-4.56	4.56	-11.98	0.76	-0.42	6.52	4.09	-1.28	15.2	-16.76	20.22	-19.24	2.68	-7.69	-2.12	1.95	0.95	2.49
Shimaa Ibraheim GOMAH	post	19901030	20170705	5.12	3.2	1.28	5.49	2.93	0.36	10.49	11.97	13.45	9.74	10.78	11.82	9.71	80.29	13.15	76.85	10.1	79.9	7.09	82.91	9.86	80.14	17.16	60.89	5.11	78.69	10.74	77.15	20.91	68.91	36.6	53.12	16.52	71.14	22.87	60.06	23.11	23.56
Shimaa Ibraheim GOMAH	pre		20161024	8.25	4.28	1.3	9.89	5.48	1.08	13.26	13.29	13.31	11.15	11.59	12.02	20.11	69.89	22.8	67.2	-1.#J	89.87	2.96	87.04	2.96	87.03	14.32	63.81	1.67	88.33	12.96	76.71	22.23	67.33	27.53	62.47	15.1	74.86	21.55	61.76	23.11	23.36
		Pre-Post		3.13	1.08	0.02	4.4	2.55	0.72	2.77	1.32	-0.14	1.41	0.81	0.2	10.4	-10.4	9.65	-9.65	#VALUE!	9.97	-4.13	4.13	-6.9	6.89	-2.84	2.92	-3.44	9.64	2.22	-0.44	1.32	-1.58	-9.07	9.35	-1.42	3.72	-1.32	1.7	0	-0.2
Tasneim ABDELKADER WAGEIH	post	19941120	20180404	3.67	3.11	2.56	3.41	2.47	1.54	11.69	12.15	12.62	11.67	12.42	13.17	2.37	87.63	4.37	85.63	3.16	86.84	4.39	85.61	5.76	84.24	14.86	74.56	22	67.79	5.35	83.09	4.17	84.61	8.63	80.62	27.59	80.54	6.02	82.09	26.92	25.36
Tasneim ABDELKADER WAGEIH	pre	19941120	20170713	7.93	3.91	3.01	5.88	3.4	0.93	12.98	12.75	12.52	15.22	14.86	14.5	16.58	73.42	11.29	78.71	1.41	88.59	2.01	87.99	3.09	86.91	16.13	76.87	14.24	75.7	0.2	87.98	31.41	57.85	17.17	72.09	29.87	78.59	7.65	76.54	28.26	26.26
		Pre-Post		4.26	0.8	0.45	2.47	0.93	-0.61	1.29	0.6	-0.1	3.55	2.44	1.33	14.21	-14.21	6.92	-6.92	-1.75	1.75	-2.38	2.38	-2.67	2.67	1.27	2.31	-7.76	7.91	-5.15	4.89	27.24	-26.76	8.54	-8.53	2.28	-1.95	1.63	-5.55	1.34	0.9
Toqa Zaki MHMUD	post	20010210	20171029	1.42	1.98	2.55	0.21	0.29	0.79	11.5	11.64	11.78	12.1	12.29	12.48	2.88	87.12	2.56	87.44	0.88	89.12	1.27	88.73	12.94	77.06	16.87	68.52	7.7	82.25	2.54	87.16	34.46	55.43	16.91	72.1	13.85	75.92	13.65	68.07	23.17	24.15
Toqa Zaki MHMUD	pre		20161127	7.63	4.52	2.66	7.25	3.64	1.98	13.88	13	12.13	13.74	13.23	12.72	14.84	75.16	16.54	73.46	5.65	84.35	3.45	86.55	12.95	77.05	10.78	70.57	2.94	83.63	0.51	86.51	40	49.57	37.63	52.35	13.98	76.57	16.65	67.65	24.84	25.76
		Pre-Post		6.21	2.54	0.11	7.04	3.35	1.19	2.38	1.36	0.35	1.64	0.94	0.24	11.96	-11.96	13.98	-13.98	4.77	-4.77	2.18	-2.18	0.01	-0.01	-6.09	2.05	-4.76	1.38	-2.03	-0.65	5.54	-5.86	20.72	-19.75	0.13	0.65	3	-0.42	1.67	1.61

## Sheet: Sheet2
			Dist 3			dist 6			tip 3		tip 6		torque 3		torque 6		rotation 3		rotation 6		Length 3
Name	Birthday	Scan Date	UR3tip-FP	UR3Center-FP	UR3apex-FP	UR6tip-FP	UR6Center-FP	UR6apex-FP	UR3-tipping	UR3-tipping-horizontal plane	UR6-tipping- FP	UR6-tipping - HP	UR3-torque/ MSP	UR3 torque- Horizontal plane	UR6torque - MSP	UR6torque - HP	UR3Rotation - MSP	UR3Rotation - FP	UR6Rotation - MSP	UR6Rotation - FP	UR3-Root Length
	Pre-Post		8.39	2.91	-2.57	1.04	0.78	0.52	11.54	-11.54	-1.37	1.37	-15.96	15.96	3.28	-1.9	26.07	-22.51	-6.54	6.37	-0.5
	Pre-Post		3.36	1.93	-0.5	2.17	1.42	0.66	5.72	-5.73	-4.57	4.04	-7	7	-0.46	4	7.78	-7.68	13.9	-12.85	0.69
	Pre-Post		4.53	2.72	0.91	1.69	0.94	0.19	9.9	-9.9	3.6	-3.59	-0.17	0.17	-4.63	3.8	11.2	-10.98	21.25	-8.38	-1.63
	Pre-Post		6.59	0.13	0.81	1.9	0.93	-0.03	22.29	-22.28	5.58	-5.58	-22.59	22.6	1.86	-4.86	27.19	-23.1	16.18	-18.93	3.42
	Pre-Post		5.5	2.51	-0.48	1.44	0.44	-0.57	14.09	-14.02	-5.43	5.43	-4.3	4.3	1.14	5.07	9.15	-4	-3.22	-1.06	-0.27
	Pre-Post		4.93	2.73	-0.66	1.48	0.84	0.2	9.32	-9.32	#VALUE!	-2.43	-9.43	9.43	-3.44	2.64	22.54	-14.84	6.22	-5.72	-0.66
	Pre-Post		6.84	2.84	-1.17	1.02	0.46	-0.1	17.76	-17.74	-4.13	3.94	-4.42	4.42	-4.52	5.28	32.29	-31.67	-9.98	11.69	0.52
	Pre-Post		4.45	1.06	1.78	2.29	1.55	0.81	12.1	62.72	4.09	-4.09	-1.44	1.44	-0.24	-1.17	24.05	-19.1	20.82	-8.14	0.95
	Pre-Post		7.78	3.32	-0.83	0.11	0.38	0.65	17.97	-17.97	-1.5	1.5	-9.77	9.77	6.09	-4.3	23.08	-21.67	-5.97	5.89	1.91
	Pre-Post		0.5	-2.01	0.84	1.02	0.62	0.22	11.58	-11.59	#VALUE!	-2.45	-11.15	11.15	3.17	-3.94	20.12	-20.11	3.06	-3.34	0.8
	Pre-Post		0.58	0.47	-0.37	1.18	0.81	0.44	-0.13	0.13	2.22	-2.22	-10.21	10.21	-2.98	-0.43	24.17	-24.1	-2.1	2.93	0.67
	Pre-Post		3.62	1.63	-0.36	0.6	0.08	-0.46	8.86	-8.85	-3.41	3.41	-7.9	7.9	2.28	-0.02	40.96	-39.6	12.29	-12.29	1.15
	Pre-Post		4.48	1.56	1.17	1.94	0.53	-0.88	11.95	-11.94	-7.16	7.16	-4.56	4.56	-0.42	6.52	15.2	-16.76	12.57	-11.27	0.95
	Pre-Post		3.13	1.08	-0.97	2.77	1.32	-0.14	10.4	-10.4	#VALUE!	9.97	-6.9	6.89	-3.44	9.64	1.32	-1.58	-1.42	3.72	0
	Pre-Post		4.26	0.8	-2.44	1.29	0.6	-0.1	14.21	-14.21	-1.75	1.75	-2.67	2.67	-7.76	7.91	27.24	-26.76	-22	17.6	1.34
	Pre-Post		6.21	2.54	-1.14	2.38	1.36	0.35	11.96	-11.96	4.77	-4.77	0.01	-0.01	-4.76	1.38	5.54	-5.86	-4.98	0.65	1.67
			UL3tip-FP	UL3Center-FP	UL3apex-FP	UL6tip-FP	UL6center-FP	UL6apex-FP	UL3-tipping	UL3tipping-Horizontal plane	UL6tipping- FP	UL6tipping - Horizontal Plane	UL3 torque - MSP	UL3torque- HP	UL6torque - MSP	UL6torque - HP	UL3Rotation - MSP	UL3Rotation - FP	UL6Rotation - MSP	UL6Rotation - FP	UL3-Root Length
			7.13	3.99	0.86	-1.9	-1.93	-1.95	12.07	-12.07	-0.19	0.19	-2.61	-7.07	-7.77	7.08	41.16	-39.11	-1.72	1.58	0.04
			1.06	0.65	0.01	0.86	0.67	0.46	1.66	-1.66	-1.13	1.13	-8.74	5.83	0.56	-0.2	0.44	3.08	6.66	-5.35	-0.28
			5.01	2.68	0.35	-0.1	0.36	0.47	11.6	-11.6	-2	2	-20.98	15.94	-4.43	3.77	4.59	1.09	9.36	-2.01	-1.04
			3.76	1.46	-0.83	1.79	0.85	-0.1	9.59	-9.59	5.12	-5.12	-6.47	-6.45	-3.42	1.13	16.88	-15.51	10.01	-8.25	0.41
			8.46	3.7	-1.06	0.32	-0.59	-1.5	20.8	-20.8	-5.22	4.98	-7.23	-9.17	-3.65	4.86	24.68	-16.43	2.14	-1.82	1.47
			3.85	1.91	0.03	1.59	0.75	-0.1	7.82	-7.82	#VALUE!	4.36	-5.78	-0.89	-2.73	3.89	21.73	-21.28	-6.81	7.54	0.73
			4.5	1.87	0.75	1.87	1.73	1.59	12.02	-12.02	-1.03	1.03	-11.94	-1.26	2.01	-1.02	23.77	-21.24	8.41	-6.58	-0.34
			2.96	0.42	1.57	2.42	1.57	0.12	-4.35	4.35	6.3	-6.3	-72.37	69.02	-0.2	-3.17	0.23	1.52	16.7	-13.93	-0.29
			5.57	2.59	-0.37	-1.29	-0.86	-0.43	11.73	-11.73	-2.23	2.1	0.91	-9.9	-5.11	5.45	19.01	-19.01	2.53	-2.86	1.14
			-1.57	-2.49	2.25	1.22	0.78	0.35	15.3	-15.3	-3.1	3.1	-9.75	3.29	2.06	1.53	17.14	-17	-7.34	12.73	0.01
			5.97	3.01	-0.05	1.95	1.23	0.51	13.56	-13.57	2.75	-2.74	-2.7	-5.9	5.06	-5.72	3.86	-4.04	-18.13	12.89	-0.03
			3.88	1.14	-0.23	2.02	1.38	0.75	10.61	-10.6	-4.44	4.43	-4.62	-1.9	-3.84	5.79	19	-16.25	-3.55	3.57	0.86
			5.64	1.11	1.93	0.65	0.16	-0.35	17.72	-17.73	-3.46	3.19	-11.98	0.76	4.09	-1.28	20.22	-19.24	-2.12	1.95	2.49
			4.4	2.55	0.72	1.41	0.81	0.2	9.65	-9.65	-4.13	4.13	-2.84	-5.02	2.22	-0.44	-9.07	9.35	-8.35	7.52	-0.2
			2.47	0.93	-0.61	3.55	2.44	1.33	6.92	-6.92	-2.38	2.38	1.27	-3.92	-5.15	4.89	8.54	-8.53	-0.78	-5.55	0.9
			7.04	3.35	-0.75	1.64	0.94	0.24	13.98	-13.98	2.18	-2.18	-10.57	2.05	-2.03	-0.65	20.72	-19.75	-5.4	5.23	1.61
