# Supplementary material for: Effectiveness of low frequency vibration on the rate of canine retraction:A randomized controlled clinical trial
Source: Research Square preprint supplement (doi:10.21203/rs.3.rs-3347770/v1), 2023-10-17
Supplement: Supplementary file 3 [file f05a2c6b9f8ec67b8e6384c7.xlsx]

## Sheet: Raw Data IV
Group A		Continous
Count	Randomization no.	UR3tip-FP	UR3Center-FP	UR3apex-FP	UR6tip-FP	UR6Center-FP	UR6apex-FP	UR3-tipping-horizontal plane	UR6-tipping- FP	UR6-tipping - HP	UR3-torque/ MSP	UR3 torque- Horizontal plane	UR6torque - MSP	UR6torque - HP	UR3Rotation - MSP	UR3Rotation - FP	UR6Rotation - MSP	UR6Rotation - FP	UR3-Root Length	UR3-tipping-/FP
1	1	5.53	2.31	0.12	0.94	0.96	0.98	13.35	0.15	-0.14	-1.75	1.75	2.05	-1.77	18.46	-18.92	-9.14	7.8	1.23	-13.35
2	2	3.67	2.15	-0.63	0.9	0.81	0.73	6.03	-1.06	0.48	-0.06	0.06	-3.98	4.01	8.99	-8.96	-15.12	14.29	0.14	-6.03
3	3	6.86	3.1	-0.66	2.44	1.12	-0.19	13.25	-5.24	7.02	-4.4	4.4	-6.78	9.65	25.56	-22.25	-20.25	17.35	0.19	-13.26
4	4	5.25	1.45	-2.35	0.66	0.12	-0.42	10.96	-3.09	3.09	9.8	-9.8	2.98	2.2	16.26	-15.23	29.93	-24.71	0.03	-10.25
5	5	3.4	0.68	2.05	1.34	0.15	-1.06	12.81	-6.99	6.99	-10.65	10.65	1.61	4.91	23.76	-25.46	-0.7	1.53	-0.42	-12.81
6	6	3.87	0.97	1.95	0.49	0.51	0.53	10.6	-0.04	0.04	1.83	-1.84	-3.46	3.37	5.17	-4.64	-15.78	13.52	1.05	-10.6
7	7	3.5	0.52	-2.44	2.27	2.18	2.09	14.09	-0.57	0.57	-1.22	1.22	0.13	0.08	7.62	-7.6	-9.38	3.47	0.12	-14.08
8	8	2.99	1.82	0.64	2.11	1.42	0.73	5.02	4.25	-4.25	-9.97	9.97	-0.75	-4.09	7.67	-7.14	-8.84	2.38	0.6	-5.02
9	9	5.35	3.54	0.08	-0.5	-0.13	0.24	-4.02	-2.08	2.08	-3.04	3.04	-9.78	9.98	9.6	-4.43	-2.28	12.77	1.01	4.02
10	10	5.61	1.4	-1.23	-0.65	-0.55	-0.47	9.41	-0.54	0.53	-0.08	0.08	-3.52	2.54	3.68	-1.89	6.7	-7.85	0.1	-9.41
11	11	5.87	2.69	-0.49	0.92	-0.28	-1.48	13.58	-7.27	7.27	-4.87	4.87	-7.31	10.14	25.36	-29	-12.68	-7.04	1.55	-13.58
12	12	5.29	1.22	1.01	2.24	1.91	1.58	10.73	0.08	-0.08	-9.35	9.35	4.52	-2.7	7.79	-4.45	-18.72	18.59	0.99	-10.49
13	13	5.02	2.58	-1.55	2.3	1.58	0.87	6.8	4.74	-4.74	-11.36	11.36	1.51	-4.82	15.26	-12.85	-13.01	-2.96	1.67	-6.8
14	14	6.09	2.46	-1.18	0.12	-0.82	-1.75	15.56	6.13	-6.13	-10.14	10.14	1.93	-6.16	17.08	-16.52	-1.36	2.43	1.98	-15.57
15	15	2.66	0.82	1.02	3.4	2.53	1.66	8.26	5.77	-5.14	-9.29	9.29	2.29	-3.4	13.52	-10.91	-9.11	-4.36	0.34	-8.26
16	16	3.8	1.09	-1.62	2.73	0.97	-0.81	13.55	-6.21	12.55	-7.28	7.28	8.37	1.74	8.65	-22.88	1.37	4.35	1.15	-13.55
17	17	4.93	1.54	1.83	0.13	0.64	1.15	13.59	-3.22	3.22	-2.55	-2.66	-1.74	3.32	12.05	-15.41	12.2	-16.46	1.66	-13.59
18	18	4.68	2.17	0.34	0.46	0.1	-0.27	9.45	2.06	-2.07	-2.03	-4.53	0.13	-2.04	10.94	-10.41	-4.21	4.33	0.67	-9.45
19	19	7.67	2.69	-2.29	-0.28	-0.68	-1.08	6.31	-2.21	2.23	1.4	-3.75	6.44	-2.29	16.19	-8.93	-4.18	2.27	-0.3	-6.31
20	20	7.14	3.15	0.84	0.49	-0.47	-0.62	10.01	-3.31	3.31	-6.16	-6.9	-2.35	4.05	26.73	-27.32	-9.53	9.78	0.65	-9.44
21	21	4.82	1.45	1.92	-0.72	-0.56	-0.38	14.88	0.86	-0.86	-4.66	-3.26	0.09	-0.46	-2.83	0.61	-7.14	11.97	0.49	-14.88
22	22	3.72	1.11	1.51	0.46	-0.3	-1.06	9.71	-3.93	3.93	-5.85	-4.81	0.33	3.93	8.62	-5.9	7.1	1.7	0.85	-9.71
23	23	4.65	1.52	0.3	0.92	0.61	0.31	15.18	-2.07	2.08	-4.08	-3.7	-5.18	5.54	12	-9.26	8.31	-6.26	0.57	-15.18
24	24	3.61	2.3	0.99	-0.41	-0.81	-1.21	5.48	2.28	-2.28	-3.79	-0.59	-4.26	-0.09	16.74	-17.6	5.15	-1.7	0.88	-5.48
25	25	6.41	2.52	-1.36	-0.04	0.16	0.36	8.09	-1.52	1.04	-5.88	0.76	2.86	-1.47	-1.91	8.19	2.94	1.39	0.53	-8.09
26	26	1.66	0.47	0.38	-0.35	0.25	0.83	4.96	-4.08	3.27	-3.28	0.51	-3.22	3.92	18.54	-16.47	-3.03	23.02	-0.03	-4.97
27	27	4.96	2.57	0.18	2.26	0.88	-0.49	9.12	-7.6	7.6	-9.31	7.87	5.02	1	1.73	0.16	-20.63	25.57	1.84	-9.12
28	28	5.18	1.72	1.65	0.12	0.13	0.15	10.34	-0.27	0.27	-6.34	6.83	-1.1	0.65	12.35	-7.97	5.06	-9.92	1.44	-10.07
29	29	3.93	1.59	0.75	0.4	0.28	0.16	10.05	0.92	-0.92	-7.55	2.81	0.25	-0.96	1.53	-2.46	-12.49	2.57	1.96	-10.04
30	30	4.66	2.04	-0.58	0.12	-0.41	-0.95	12.13	2.72	-2.26	-1.66	1.19	-6.42	5.59	1.2	-0.78	-2.79	1.8	0.52	-12.13
31	31	5.08	2.37	0.26	1.31	1.11	0.91	11.9	0.66	-0.66	-0.8	-2.6	-10.34	6.01	18.69	-18.82	1.03	-3.7	2.09	-11.9
32	32	4.38	1.61	0.77	1.35	0.57	-0.21	14.39	-5.85	5.85	-3.93	2.93	2.81	1.99	16.93	-18.36	7.78	0.25	0.49	-14.39
33
34
35
36
37
38
39
40
41
42
43
44
45
46
47
48
49
50

## Sheet: Raw Data CR
Group A
Count	Randomization no.	UR3tip-FP	UR3Center-FP	UR3apex-FP	UR6tip-FP	UR6Center-FP	UR6apex-FP	UR3-tipping-horizontal plane	UR6-tipping- FP	UR6-tipping - HP	UR3-torque/ MSP	UR3 torque- Horizontal plane	UR6torque - MSP	UR6torque - HP	UR3Rotation - MSP	UR3Rotation - FP	UR6Rotation - MSP	UR6Rotation - FP	UR3-Root Length	UR3-tipping-/FP
1	1	8.39	2.91	-2.57	1.04	0.78	0.52	11.54	-1.37	1.37	-5.12	9.97	3.28	-1.9	26.07	-22.51	1	-1.04	-0.5	-11.54
2	4	3.36	1.93	-0.5	2.17	1.42	0.66	5.72	-4.57	4.04	-7	7	-0.46	4	7.78	-7.68	10.63	-3.01	0.69	-5.73
3	7	4.53	2.72	0.91	1.69	0.94	0.19	9.9	3.6	-3.59	-0.17	0.17	-4.63	3.8	11.2	-10.98	1.54	-8.38	-1.63	-9.9
4	8	6.59	0.13	0.81	1.9	0.93	-0.03	22.29	5.58	-5.58	-8.25	5.75	1.86	-4.86	23.6	-23.1	5.49	-4.77	3.42	-22.28
5	9	5.5	2.51	-0.48	1.44	0.44	-0.57	14.09	-5.43	5.43	-4.3	4.3	1.14	5.07	9.15	-4	2.31	-1.06	-0.27	-14.02
6	10	4.93	2.73	-0.66	1.48	0.84	0.2	9.32	-1.16	-2.43	-9.43	9.43	-3.44	2.64	22.54	-14.84	6.22	-5.72	-0.66	-9.32
7	13	6.84	2.84	1.55	1.02	0.46	-0.1	17.76	-4.13	3.94	-4.42	4.42	-4.52	5.28	22.47	-26.39	-2.21	3	0.52	-17.74
8	16	4.45	1.06	1.78	2.29	1.55	0.81	12.1	4.09	-4.09	-1.44	1.44	-0.24	-1.17	3.83	-12.26	2.06	-4.46	0.95	62.72
9	18	7.78	3.32	0.02	0.11	0.38	0.65	17.97	-1.5	1.5	-9.77	9.77	6.09	-4.3	23.08	-21.67	2.81	0.54	1.91	-17.97
10	20	0.5	-2.01	0.84	1.02	0.62	0.22	11.58	-1.35	-2.45	-7.14	5.77	3.17	-3.94	20.12	-20.11	3.06	-3.34	0.8	-11.59
11	21	0.58	0.47	0.81	1.18	0.81	0.44	-0.13	2.22	-2.22	-10.21	2.12	-2.98	-0.43	13.2	-24.1	-2.1	2.93	0.67	0.13
12	22	3.62	1.63	-0.36	0.6	0.08	-0.46	8.86	-3.41	3.41	-4.58	7.9	2.28	-0.02	30.95	-39.6	2.61	-7.11	1.15	-8.85
13	25	4.48	1.56	1.17	1.94	0.53	-0.88	11.95	-7.16	7.16	-4.56	4.56	-0.42	6.52	15.2	-16.76	2.68	-7.69	0.95	-11.94
14	28	3.13	1.08	0.02	2.77	1.32	-0.14	10.4	-4.41	9.97	-6.9	6.89	-3.44	6.16	1.32	-1.58	-1.42	3.72	0	-10.4
15	29	4.26	0.8	0.45	1.29	0.6	-0.1	14.21	-1.75	1.75	-2.67	2.67	-7.76	7.91	27.24	-14.07	2.28	-1.95	1.34	-14.21
16	31	6.21	2.54	0.11	2.38	1.36	0.35	11.96	4.77	-4.77	0.01	-0.01	-4.76	1.38	5.54	-5.86	0.13	0.65	1.67	-11.96
17	35	7.13	3.99	0.86	-1.9	-1.93	-1.95	12.07	-0.19	0.19	-2.61	1.56	-7.77	7.08	28.36	-39.11	0.76	1.58	0.04	-12.07
18	36	1.06	0.65	0.01	0.86	0.67	0.46	1.66	-1.13	1.13	-8.74	5.83	0.56	-0.2	0.44	3.08	3.03	-5.35	-0.28	-1.66
19	38	5.01	2.68	0.35	-0.1	0.36	0.47	11.6	-2	2	-7.5	8.44	-4.43	3.77	4.59	1.09	5.69	-2.01	-1.04	-11.6
20		3.76	1.46	-0.83	1.79	0.85	-0.1	9.59	5.12	-5.12	-6.47	6.84	-3.42	1.13	16.88	-15.51	6.89	-8.25	0.41	-9.59
21		8.46	3.7	-1.06	0.32	-0.59	-1.5	20.8	-5.22	4.98	-7.23	-9.17	-3.65	4.86	24.68	-16.43	2.14	-1.82	1.47	-20.8
22		3.85	1.91	0.03	1.59	0.75	-0.1	7.82	-1.55	4.36	-5.78	-0.89	-2.73	3.89	21.73	-21.28	1.95	1.42	0.73	-7.82
23		4.5	1.87	0.75	1.87	1.73	1.59	12.02	-1.03	1.03	-7.51	-1.26	2.01	-1.02	23.77	-21.24	4.46	-1.38	-0.34	-12.02
24		2.96	0.42	1.57	2.42	1.57	0.12	-4.35	6.3	-6.3	8.56	3.35	-0.2	-3.17	0.23	1.52	5	-6.97	-0.29	4.35
25		5.57	2.59	-0.37	-1.29	-0.86	-0.43	11.73	-2.23	2.1	0.91	2.3	-5.11	3.09	19.01	-19.01	2.53	-2.86	1.14	-11.73
26		-1.57	-2.49	2.25	1.22	0.78	0.35	15.3	-3.1	3.1	-9.75	3.29	2.06	1.53	17.14	-17	-0.11	0.87	0.01	-15.3
27		5.97	3.01	0.94	3	1.23	0.51	13.56	2.75	-2.74	-2.7	2.03	5.06	-5.72	3.86	-4.04	1	1.13	-0.03	-13.57
28		3.88	1.14	-0.23	2.02	1.38	0.75	10.61	-4.44	4.43	-4.62	-1.9	-3.84	5.79	19	-16.25	-0.52	3.57	0.86	-10.6
29		5.64	1.11	1.93	0.65	0.16	-0.35	17.72	-3.46	3.19	-11.98	0.76	4.09	2.07	20.22	-19.24	-2.12	1.95	2.49	-17.73
30		4.4	2.55	0.72	1.41	0.81	0.2	9.65	-4.13	4.13	-2.84	2.92	2.22	1.51	-9.07	-1.28	-1.32	1.7	-0.2	-9.65
31		2.47	0.93	-0.61	3.55	2.44	1.33	6.92	-2.38	2.38	1.27	2.31	-5.15	4.89	8.54	-8.53	1.63	-5.55	0.9	-6.92
32		7.04	3.35	1.19	1.64	0.94	0.24	13.98	2.18	-2.18	-6.09	2.05	-2.03	-0.65	20.72	-19.75	3	-0.42	1.61	-13.98
33
34
35
36
37
38
39
40
41
42
43
44
45
46
47
48
49
50

## Sheet: Continous Median
	UR3tip-FP	UR3tip-FP	UR3Center-FP	UR3Center-FP	UR3apex-FP	UR3apex-FP	UR6tip-FP	UR6tip-FP	UR6Center-FP	UR6Center-FP	UR6apex-FP	UR6apex-FP	UR3-tipping-horizontal plane	UR3-tipping-horizontal plane	UR6-tipping- FP	UR6-tipping- FP	UR6-tipping - HP	UR6-tipping - HP	UR3-torque/ MSP	UR3-torque/ MSP	UR3 torque- Horizontal plane	UR3 torque- Horizontal plane	UR6torque - MSP	UR6torque - MSP	UR6torque - HP	UR6torque - HP	UR3Rotation - MSP	UR3Rotation - MSP	UR3Rotation - FP	UR3Rotation - FP	UR6Rotation - MSP	UR6Rotation - MSP	UR6Rotation - FP	UR6Rotation - FP	UR3-Root Length	UR3-Root Length	UR3-tipping-/FP	UR3-tipping-/FP
1	5.53	8.39	2.31	2.91	0.12	-2.57	0.94	1.04	0.96	0.78	0.98	0.52	13.35	11.54	0.15	-1.37	-0.14	1.37	-1.75	-5.12	1.75	9.97	2.05	3.28	-1.77	-1.9	18.46	26.07	-18.92	-22.51	-9.14	1	7.8	-1.04	1.23	-0.5	-13.35	-11.54
2	3.67	3.36	2.15	1.93	-0.63	-0.5	0.9	2.17	0.81	1.42	0.73	0.66	6.03	5.72	-1.06	-4.57	0.48	4.04	-0.06	-7	0.06	7	-3.98	-0.46	4.01	4	8.99	7.78	-8.96	-7.68	-15.12	10.63	14.29	-3.01	0.14	0.69	-6.03	-5.73
3	6.86	4.53	3.1	2.72	-0.66	0.91	2.44	1.69	1.12	0.94	-0.19	0.19	13.25	9.9	-5.24	3.6	7.02	-3.59	-4.4	-0.17	4.4	0.17	-6.78	-4.63	9.65	3.8	25.56	11.2	-22.25	-10.98	-20.25	1.54	17.35	-8.38	0.19	-1.63	-13.26	-9.9
4	5.25	6.59	1.45	0.13	-2.35	0.81	0.66	1.9	0.12	0.93	-0.42	-0.03	10.96	22.29	-3.09	5.58	3.09	-5.58	9.8	-8.25	-9.8	5.75	2.98	1.86	2.2	-4.86	16.26	23.6	-15.23	-23.1	29.93	5.49	-24.71	-4.77	0.03	3.42	-10.25	-22.28
5	3.4	5.5	0.68	2.51	2.05	-0.48	1.34	1.44	0.15	0.44	-1.06	-0.57	12.81	14.09	-6.99	-5.43	6.99	5.43	-10.65	-4.3	10.65	4.3	1.61	1.14	4.91	5.07	23.76	9.15	-25.46	-4	-0.7	2.31	1.53	-1.06	-0.42	-0.27	-12.81	-14.02
6	3.87	4.93	0.97	2.73	1.95	-0.66	0.49	1.48	0.51	0.84	0.53	0.2	10.6	9.32	-0.04	-1.16	0.04	-2.43	1.83	-9.43	-1.84	9.43	-3.46	-3.44	3.37	2.64	5.17	22.54	-4.64	-14.84	-15.78	6.22	13.52	-5.72	1.05	-0.66	-10.6	-9.32
7	3.5	6.84	0.52	2.84	-2.44	1.55	2.27	1.02	2.18	0.46	2.09	-0.1	14.09	17.76	-0.57	-4.13	0.57	3.94	-1.22	-4.42	1.22	4.42	0.13	-4.52	0.08	5.28	7.62	22.47	-7.6	-26.39	-9.38	-2.21	3.47	3	0.12	0.52	-14.08	-17.74
8	2.99	4.45	1.82	1.06	0.64	1.78	2.11	2.29	1.42	1.55	0.73	0.81	5.02	12.1	4.25	4.09	-4.25	-4.09	-9.97	-1.44	9.97	1.44	-0.75	-0.24	-4.09	-1.17	7.67	3.83	-7.14	-12.26	-8.84	2.06	2.38	-4.46	0.6	0.95	-5.02	62.72
9	5.35	7.78	3.54	3.32	0.08	0.02	-0.5	0.11	-0.13	0.38	0.24	0.65	-4.02	17.97	-2.08	-1.5	2.08	1.5	-3.04	-9.77	3.04	9.77	-9.78	6.09	9.98	-4.3	9.6	23.08	-4.43	-21.67	-2.28	2.81	12.77	0.54	1.01	1.91	4.02	-17.97
10	5.61	0.5	1.4	-2.01	-1.23	0.84	-0.65	1.02	-0.55	0.62	-0.47	0.22	9.41	11.58	-0.54	-1.35	0.53	-2.45	-0.08	-7.14	0.08	5.77	-3.52	3.17	2.54	-3.94	3.68	20.12	-1.89	-20.11	6.7	3.06	-7.85	-3.34	0.1	0.8	-9.41	-11.59
11	5.87	0.58	2.69	0.47	-0.49	0.81	0.92	1.18	-0.28	0.81	-1.48	0.44	13.58	-0.13	-7.27	2.22	7.27	-2.22	-4.87	-10.21	4.87	2.12	-7.31	-2.98	10.14	-0.43	25.36	13.2	-29	-24.1	-12.68	-2.1	-7.04	2.93	1.55	0.67	-13.58	0.13
12	5.29	3.62	1.22	1.63	1.01	-0.36	2.24	0.6	1.91	0.08	1.58	-0.46	10.73	8.86	0.08	-3.41	-0.08	3.41	-9.35	-4.58	9.35	7.9	4.52	2.28	-2.7	-0.02	7.79	30.95	-4.45	-39.6	-18.72	2.61	18.59	-7.11	0.99	1.15	-10.49	-8.85
13	5.02	4.48	2.58	1.56	-1.55	1.17	2.3	1.94	1.58	0.53	0.87	-0.88	6.8	11.95	4.74	-7.16	-4.74	7.16	-11.36	-4.56	11.36	4.56	1.51	-0.42	-4.82	6.52	15.26	15.2	-12.85	-16.76	-13.01	2.68	-2.96	-7.69	1.67	0.95	-6.8	-11.94
14	6.09	3.13	2.46	1.08	-1.18	0.02	0.12	2.77	-0.82	1.32	-1.75	-0.14	15.56	10.4	6.13	-4.41	-6.13	9.97	-10.14	-6.9	10.14	6.89	1.93	-3.44	-6.16	6.16	17.08	1.32	-16.52	-1.58	-1.36	-1.42	2.43	3.72	1.98	0	-15.57	-10.4
15	2.66	4.26	0.82	0.8	1.02	0.45	3.4	1.29	2.53	0.6	1.66	-0.1	8.26	14.21	5.77	-1.75	-5.14	1.75	-9.29	-2.67	9.29	2.67	2.29	-7.76	-3.4	7.91	13.52	27.24	-10.91	-14.07	-9.11	2.28	-4.36	-1.95	0.34	1.34	-8.26	-14.21
16	3.8	6.21	1.09	2.54	-1.62	0.11	2.73	2.38	0.97	1.36	-0.81	0.35	13.55	11.96	-6.21	4.77	12.55	-4.77	-7.28	0.01	7.28	-0.01	8.37	-4.76	1.74	1.38	8.65	5.54	-22.88	-5.86	1.37	0.13	4.35	0.65	1.15	1.67	-13.55	-11.96
17	4.93	7.13	1.54	3.99	1.83	0.86	0.13	-1.9	0.64	-1.93	1.15	-1.95	13.59	12.07	-3.22	-0.19	3.22	0.19	-2.55	-2.61	-2.66	1.56	-1.74	-7.77	3.32	7.08	12.05	28.36	-15.41	-39.11	12.2	0.76	-16.46	1.58	1.66	0.04	-13.59	-12.07
18	4.68	1.06	2.17	0.65	0.34	0.01	0.46	0.86	0.1	0.67	-0.27	0.46	9.45	1.66	2.06	-1.13	-2.07	1.13	-2.03	-8.74	-4.53	5.83	0.13	0.56	-2.04	-0.2	10.94	0.44	-10.41	3.08	-4.21	3.03	4.33	-5.35	0.67	-0.28	-9.45	-1.66
19	7.67	5.01	2.69	2.68	-2.29	0.35	-0.28	-0.1	-0.68	0.36	-1.08	0.47	6.31	11.6	-2.21	-2	2.23	2	1.4	-7.5	-3.75	8.44	6.44	-4.43	-2.29	3.77	16.19	4.59	-8.93	1.09	-4.18	5.69	2.27	-2.01	-0.3	-1.04	-6.31	-11.6
20	7.14	3.76	3.15	1.46	0.84	-0.83	0.49	1.79	-0.47	0.85	-0.62	-0.1	10.01	9.59	-3.31	5.12	3.31	-5.12	-6.16	-6.47	-6.9	6.84	-2.35	-3.42	4.05	1.13	26.73	16.88	-27.32	-15.51	-9.53	6.89	9.78	-8.25	0.65	0.41	-9.44	-9.59
21	4.82	8.46	1.45	3.7	1.92	-1.06	-0.72	0.32	-0.56	-0.59	-0.38	-1.5	14.88	20.8	0.86	-5.22	-0.86	4.98	-4.66	-7.23	-3.26	-9.17	0.09	-3.65	-0.46	4.86	-2.83	24.68	0.61	-16.43	-7.14	2.14	11.97	-1.82	0.49	1.47	-14.88	-20.8
22	3.72	3.85	1.11	1.91	1.51	0.03	0.46	1.59	-0.3	0.75	-1.06	-0.1	9.71	7.82	-3.93	-1.55	3.93	4.36	-5.85	-5.78	-4.81	-0.89	0.33	-2.73	3.93	3.89	8.62	21.73	-5.9	-21.28	7.1	1.95	1.7	1.42	0.85	0.73	-9.71	-7.82
23	4.65	4.5	1.52	1.87	0.3	0.75	0.92	1.87	0.61	1.73	0.31	1.59	15.18	12.02	-2.07	-1.03	2.08	1.03	-4.08	-7.51	-3.7	-1.26	-5.18	2.01	5.54	-1.02	12	23.77	-9.26	-21.24	8.31	4.46	-6.26	-1.38	0.57	-0.34	-15.18	-12.02
24	3.61	2.96	2.3	0.42	0.99	1.57	-0.41	2.42	-0.81	1.57	-1.21	0.12	5.48	-4.35	2.28	6.3	-2.28	-6.3	-3.79	8.56	-0.59	3.35	-4.26	-0.2	-0.09	-3.17	16.74	0.23	-17.6	1.52	5.15	5	-1.7	-6.97	0.88	-0.29	-5.48	4.35
25	6.41	5.57	2.52	2.59	-1.36	-0.37	-0.04	-1.29	0.16	-0.86	0.36	-0.43	8.09	11.73	-1.52	-2.23	1.04	2.1	-5.88	0.91	0.76	2.3	2.86	-5.11	-1.47	3.09	-1.91	19.01	8.19	-19.01	2.94	2.53	1.39	-2.86	0.53	1.14	-8.09	-11.73
26	1.66	-1.57	0.47	-2.49	0.38	2.25	-0.35	1.22	0.25	0.78	0.83	0.35	4.96	15.3	-4.08	-3.1	3.27	3.1	-3.28	-9.75	0.51	3.29	-3.22	2.06	3.92	1.53	18.54	17.14	-16.47	-17	-3.03	-0.11	23.02	0.87	-0.03	0.01	-4.97	-15.3
27	4.96	5.97	2.57	3.01	0.18	0.94	2.26	3	0.88	1.23	-0.49	0.51	9.12	13.56	-7.6	2.75	7.6	-2.74	-9.31	-2.7	7.87	2.03	5.02	5.06	1	-5.72	1.73	3.86	0.16	-4.04	-20.63	1	25.57	1.13	1.84	-0.03	-9.12	-13.57
28	5.18	3.88	1.72	1.14	1.65	-0.23	0.12	2.02	0.13	1.38	0.15	0.75	10.34	10.61	-0.27	-4.44	0.27	4.43	-6.34	-4.62	6.83	-1.9	-1.1	-3.84	0.65	5.79	12.35	19	-7.97	-16.25	5.06	-0.52	-9.92	3.57	1.44	0.86	-10.07	-10.6
29	3.93	5.64	1.59	1.11	0.75	1.93	0.4	0.65	0.28	0.16	0.16	-0.35	10.05	17.72	0.92	-3.46	-0.92	3.19	-7.55	-11.98	2.81	0.76	0.25	4.09	-0.96	2.07	1.53	20.22	-2.46	-19.24	-12.49	-2.12	2.57	1.95	1.96	2.49	-10.04	-17.73
30	4.66	4.4	2.04	2.55	-0.58	0.72	0.12	1.41	-0.41	0.81	-0.95	0.2	12.13	9.65	2.72	-4.13	-2.26	4.13	-1.66	-2.84	1.19	2.92	-6.42	2.22	5.59	1.51	1.2	-9.07	-0.78	-1.28	-2.79	-1.32	1.8	1.7	0.52	-0.2	-12.13	-9.65
31	5.08	2.47	2.37	0.93	0.26	-0.61	1.31	3.55	1.11	2.44	0.91	1.33	11.9	6.92	0.66	-2.38	-0.66	2.38	-0.8	1.27	-2.6	2.31	-10.34	-5.15	6.01	4.89	18.69	8.54	-18.82	-8.53	1.03	1.63	-3.7	-5.55	2.09	0.9	-11.9	-6.92
32	4.38	7.04	1.61	3.35	0.77	1.19	1.35	1.64	0.57	0.94	-0.21	0.24	14.39	13.98	-5.85	2.18	5.85	-2.18	-3.93	-6.09	2.93	2.05	2.81	-2.03	1.99	-0.65	16.93	20.72	-18.36	-19.75	7.78	3	0.25	-0.42	0.49	1.61	-14.39	-13.98
	UR3tip-FP	UR3tip-FP	UR3Center-FP	UR3Center-FP	UR3apex-FP	UR3apex-FP	UR6tip-FP	UR6tip-FP	UR6Center-FP	UR6Center-FP	UR6apex-FP	UR6apex-FP	UR3-tipping-horizontal plane	UR3-tipping-horizontal plane	UR6-tipping- FP	UR6-tipping- FP	UR6-tipping - HP	UR6-tipping - HP	UR3-torque/ MSP	UR3-torque/ MSP	UR3 torque- Horizontal plane	UR3 torque- Horizontal plane	UR6torque - MSP	UR6torque - MSP	UR6torque - HP	UR6torque - HP	UR3Rotation - MSP	UR3Rotation - MSP	UR3Rotation - FP	UR3Rotation - FP	UR6Rotation - MSP	UR6Rotation - MSP	UR6Rotation - FP	UR6Rotation - FP	UR3-Root Length	UR3-Root Length	UR3-tipping-/FP	UR3-tipping-/FP
Shapiro wilk	#REF!	#REF!	#REF!	#REF!	#REF!	#REF!	#REF!	#REF!	#REF!	#REF!	#REF!	#REF!	#REF!	#REF!	#REF!	#REF!	#REF!	#REF!	#REF!	#REF!	#REF!	#REF!	#REF!	#REF!	#REF!	#REF!	#REF!	#REF!	#REF!	#REF!	#REF!	#REF!	#REF!	#REF!	#REF!	#REF!	#REF!	#REF!
Levene's		0.257175		0.820954		0.188078
T Test eq		0.64524		0.631703		0.330482
Mann - Whitney U								0.418		0.258		0.603		0.817		0.84	1.84	2.84	3.84	4.84	5.84	6.84	7.84	8.84	9.84	10.84	11.84	12.84	13.84	14.84	15.84	16.84	17.84	18.84	19.84	20.84	21.84	22.84
Mean	4.7575	4.54	1.86312	1.72156	0.0690625	0.35625	0.872813	1.35531	0.436875	0.729687	0.0259375	0.104688	10.1741	11.2562	-1.14156	-0.952813	1.37156	0.94125	-4.32188	-4.96969	1.935	3.45656	-0.839687	-1.16125	1.69906	1.71844	11.9978	15.1059	-11.3706	-14.9528	-3.525	2.22188	3.06781	-1.8775	0.81375	0.577813	-10.1184	-8.91531
SD	1.31526	2.31141	0.794531	1.46022	1.31472	1.0074	1.09912	1.12276	0.871863	0.802237	0.964565	0.704648	4.05468	5.49388	3.71957	3.60472	4.15069	4.00683	4.45586	4.17622	5.61983	3.99133	4.49685	3.6909	4.18642	3.71896	7.8771	9.98105	8.93247	10.4868	10.8055	2.85702	10.8318	3.68301	0.691724	1.03999	4.05295	14.1778
Median	4.875	4.49	1.77	1.89	0.28	0.4	0.575	1.46	0.265	0.795	-0.02	0.2	10.47	11.665	-0.815	-1.525	0.55	1.625	-4.24	-5.45	1.205	3.105	0.11	-1.245	1.865	1.8	12.025	18.07	-9.835	-16.34	-3.605	2.21	2.325	-1.6	0.66	0.68	-10.16	-11.595
Min	1.66	-1.57	0.47	-2.49	-2.44	-2.57	-0.72	-1.9	-0.82	-1.93	-1.75	-1.95	-4.02	-4.35	-7.6	-7.16	-6.13	-6.3	-11.36	-11.98	-9.8	-9.17	-10.34	-7.77	-6.16	-5.72	-2.83	-9.07	-29	-39.6	-20.63	-2.21	-24.71	-8.38	-0.42	-1.63	-15.57	-22.28
Max	7.67	8.46	3.54	3.99	2.05	2.25	3.4	3.55	2.53	2.44	2.09	1.59	15.56	22.29	6.13	6.3	12.55	9.97	9.8	8.56	11.36	9.97	8.37	6.09	10.14	7.91	26.73	30.95	8.19	3.08	29.93	10.63	25.57	3.72	2.09	3.42	4.02	62.72
UR3tip-FP
			Intervention	Control	P - Value
		Median	4.875	4.49
		Min	1.66	-1.57	0.64524
		Max	7.67	8.46
		Column1	Intervention	Control
		Median	4.875	4.49
UR3Center-FP
			Intervention	Control	P - Value
		Median	1.77	1.89
		Min	0.47	-2.49	0
		Max	3.54	3.99
		Column1	Intervention	Control
		Median	1.77	1.89
UR3apex-FP
			Intervention	Control	P - Value
		Median	0.28	0.4
		Min	-2.44	-2.57	0
		Max	2.05	2.25
		Column1	Intervention	Control
		Median	0.28	0.4
UR6tip-FP
			Intervention	Control	P - Value
		Median	0.575	1.46
		Min	-0.72	-1.9	0.418
		Max	3.4	3.55
		Column1	Intervention	Control
		Median	0.575	1.46
UR6Center-FP
			Intervention	Control	P - Value
		Median	0.265	0.795
		Min	-0.82	-1.93	0.258
		Max	2.53	2.44
		Column1	Intervention	Control
		Median	0.265	0.795
UR6apex-FP
			Intervention	Control	P - Value
		Median	-0.02	0.2
		Min	-1.75	-1.95	0.603
		Max	2.09	1.59
		Column1	Intervention	Control
		Median	-0.02	0.2
UR3-tipping-horizontal plane
			Intervention	Control	P - Value
		Median	10.47	11.665
		Min	-4.02	-4.35	0.817
		Max	15.56	22.29
		Column1	Intervention	Control
		Median	10.47	11.665
UR6-tipping- FP
			Intervention	Control	P - Value
		Median	-0.815	-1.525
		Min	-7.6	-7.16	0
		Max	6.13	6.3
		Column1	Intervention	Control
		Median	-0.815	-1.525
All Postoperative
				Intervention			Control		P - Value
			Median	Min	Max	Median	Min	Max
		UR3Center-FP	1.77	0.47	3.54	1.89	-2.49	3.99	0
		UR3apex-FP	0.28	-2.44	2.05	0.4	-2.57	2.25	0
		UR6tip-FP	0.575	-0.72	3.4	1.46	-1.9	3.55	0.418
		UR6Center-FP	0.265	-0.82	2.53	0.795	-1.93	2.44	0.258
		UR6apex-FP	-0.02	-1.75	2.09	0.2	-1.95	1.59	0.603
		UR3-tipping-horizontal plane	10.47	-4.02	15.56	11.665	-4.35	22.29	0.817
		UR6-tipping- FP	-0.815	-7.6	6.13	-1.525	-7.16	6.3	0.84
		UR6-tipping - HP	0.55	-6.13	12.55	1.625	-6.3	9.97	2.84
		UR3-torque/ MSP	-4.24	-11.36	9.8	-5.45	-11.98	8.56	4.84
		UR3 torque- Horizontal plane	1.205	-9.8	11.36	3.105	-9.17	9.97	6.84
		UR6torque - MSP	0.11	-10.34	8.37	-1.245	-7.77	6.09	8.84
			Column1	Intervention	Control
			UR3Center-FP	1.77	1.89
			UR3apex-FP	0.28	0.4
			UR6tip-FP	0.575	1.46
			UR6Center-FP	0.265	0.795
			UR6apex-FP	-0.02	0.2
			UR3-tipping-horizontal plane	10.47	11.665
			UR6-tipping- FP	-0.815	-1.525
			UR6-tipping - HP	0.55	1.625
			UR3-torque/ MSP	-4.24	-5.45
			UR3 torque- Horizontal plane	1.205	3.105
			UR6torque - MSP	0.11	-1.245
				Intervention	Control	P - Value
		UR3Center-FP	Median	1.77	1.89
			Min	0.47	-2.49	0
			Max	3.54	3.99
		UR3apex-FP	Median	0.28	0.4
			Min	-2.44	-2.57	0
			Max	2.05	2.25
		UR6tip-FP	Median	0.575	1.46
			Min	-0.72	-1.9	0.418
			Max	3.4	3.55
		UR6Center-FP	Median	0.265	0.795
			Min	-0.82	-1.93	0.258
			Max	2.53	2.44
		UR6apex-FP	Median	-0.02	0.2
			Min	-1.75	-1.95	0.603
			Max	2.09	1.59
		UR3-tipping-horizontal plane	Median	10.47	11.665
			Min	-4.02	-4.35	0.817
			Max	15.56	22.29
		UR6-tipping- FP	Median	-0.815	-1.525
			Min	-7.6	-7.16	0.84
			Max	6.13	6.3
		UR6-tipping - HP	Median	0.55	1.625
			Min	-6.13	-6.3	2.84
			Max	12.55	9.97
		UR3-torque/ MSP	Median	-4.24	-5.45
			Min	-11.36	-11.98	4.84
			Max	9.8	8.56
		UR3 torque- Horizontal plane	Median	1.205	3.105
			Min	-9.8	-9.17	6.84
			Max	11.36	9.97
		UR6torque - MSP	Median	0.11	-1.245
			Min	-10.34	-7.77	8.84
			Max	8.37	6.09

## Sheet: Continous Mean
	UR3tip-FP	UR3tip-FP	UR3Center-FP	UR3Center-FP	UR3apex-FP	UR3apex-FP	UR6tip-FP	UR6tip-FP	UR6Center-FP	UR6Center-FP	UR6apex-FP	UR6apex-FP	UR3-tipping-horizontal plane	UR3-tipping-horizontal plane	UR6-tipping- FP	UR6-tipping- FP	UR6-tipping - HP	UR6-tipping - HP	UR3-torque/ MSP	UR3-torque/ MSP	UR3 torque- Horizontal plane	UR3 torque- Horizontal plane	UR6torque - MSP	UR6torque - MSP	UR6torque - HP	UR6torque - HP	UR3Rotation - MSP	UR3Rotation - MSP	UR3Rotation - FP	UR3Rotation - FP	UR6Rotation - MSP	UR6Rotation - MSP	UR6Rotation - FP	UR6Rotation - FP	UR3-Root Length	UR3-Root Length	UR3-tipping-/FP	UR3-tipping-/FP
1	5.53	8.39	2.31	2.91	0.12	-2.57	0.94	1.04	0.96	0.78	0.98	0.52	13.35	11.54	0.15	-1.37	-0.14	1.37	-1.75	-5.12	1.75	9.97	2.05	3.28	-1.77	-1.9	18.46	26.07	-18.92	-22.51	-9.14	1	7.8	-1.04	1.23	-0.5	-13.35	-11.54
2	3.67	3.36	2.15	1.93	-0.63	-0.5	0.9	2.17	0.81	1.42	0.73	0.66	6.03	5.72	-1.06	-4.57	0.48	4.04	-0.06	-7	0.06	7	-3.98	-0.46	4.01	4	8.99	7.78	-8.96	-7.68	-15.12	10.63	14.29	-3.01	0.14	0.69	-6.03	-5.73
3	6.86	4.53	3.1	2.72	-0.66	0.91	2.44	1.69	1.12	0.94	-0.19	0.19	13.25	9.9	-5.24	3.6	7.02	-3.59	-4.4	-0.17	4.4	0.17	-6.78	-4.63	9.65	3.8	25.56	11.2	-22.25	-10.98	-20.25	1.54	17.35	-8.38	0.19	-1.63	-13.26	-9.9
4	5.25	6.59	1.45	0.13	-2.35	0.81	0.66	1.9	0.12	0.93	-0.42	-0.03	10.96	22.29	-3.09	5.58	3.09	-5.58	9.8	-8.25	-9.8	5.75	2.98	1.86	2.2	-4.86	16.26	23.6	-15.23	-23.1	29.93	5.49	-24.71	-4.77	0.03	3.42	-10.25	-22.28
5	3.4	5.5	0.68	2.51	2.05	-0.48	1.34	1.44	0.15	0.44	-1.06	-0.57	12.81	14.09	-6.99	-5.43	6.99	5.43	-10.65	-4.3	10.65	4.3	1.61	1.14	4.91	5.07	23.76	9.15	-25.46	-4	-0.7	2.31	1.53	-1.06	-0.42	-0.27	-12.81	-14.02
6	3.87	4.93	0.97	2.73	1.95	-0.66	0.49	1.48	0.51	0.84	0.53	0.2	10.6	9.32	-0.04	-1.16	0.04	-2.43	1.83	-9.43	-1.84	9.43	-3.46	-3.44	3.37	2.64	5.17	22.54	-4.64	-14.84	-15.78	6.22	13.52	-5.72	1.05	-0.66	-10.6	-9.32
7	3.5	6.84	0.52	2.84	-2.44	1.55	2.27	1.02	2.18	0.46	2.09	-0.1	14.09	17.76	-0.57	-4.13	0.57	3.94	-1.22	-4.42	1.22	4.42	0.13	-4.52	0.08	5.28	7.62	22.47	-7.6	-26.39	-9.38	-2.21	3.47	3	0.12	0.52	-14.08	-17.74
8	2.99	4.45	1.82	1.06	0.64	1.78	2.11	2.29	1.42	1.55	0.73	0.81	5.02	12.1	4.25	4.09	-4.25	-4.09	-9.97	-1.44	9.97	1.44	-0.75	-0.24	-4.09	-1.17	7.67	3.83	-7.14	-12.26	-8.84	2.06	2.38	-4.46	0.6	0.95	-5.02	62.72
9	5.35	7.78	3.54	3.32	0.08	0.02	-0.5	0.11	-0.13	0.38	0.24	0.65	-4.02	17.97	-2.08	-1.5	2.08	1.5	-3.04	-9.77	3.04	9.77	-9.78	6.09	9.98	-4.3	9.6	23.08	-4.43	-21.67	-2.28	2.81	12.77	0.54	1.01	1.91	4.02	-17.97
10	5.61	0.5	1.4	-2.01	-1.23	0.84	-0.65	1.02	-0.55	0.62	-0.47	0.22	9.41	11.58	-0.54	-1.35	0.53	-2.45	-0.08	-7.14	0.08	5.77	-3.52	3.17	2.54	-3.94	3.68	20.12	-1.89	-20.11	6.7	3.06	-7.85	-3.34	0.1	0.8	-9.41	-11.59
11	5.87	0.58	2.69	0.47	-0.49	0.81	0.92	1.18	-0.28	0.81	-1.48	0.44	13.58	-0.13	-7.27	2.22	7.27	-2.22	-4.87	-10.21	4.87	2.12	-7.31	-2.98	10.14	-0.43	25.36	13.2	-29	-24.1	-12.68	-2.1	-7.04	2.93	1.55	0.67	-13.58	0.13
12	5.29	3.62	1.22	1.63	1.01	-0.36	2.24	0.6	1.91	0.08	1.58	-0.46	10.73	8.86	0.08	-3.41	-0.08	3.41	-9.35	-4.58	9.35	7.9	4.52	2.28	-2.7	-0.02	7.79	30.95	-4.45	-39.6	-18.72	2.61	18.59	-7.11	0.99	1.15	-10.49	-8.85
13	5.02	4.48	2.58	1.56	-1.55	1.17	2.3	1.94	1.58	0.53	0.87	-0.88	6.8	11.95	4.74	-7.16	-4.74	7.16	-11.36	-4.56	11.36	4.56	1.51	-0.42	-4.82	6.52	15.26	15.2	-12.85	-16.76	-13.01	2.68	-2.96	-7.69	1.67	0.95	-6.8	-11.94
14	6.09	3.13	2.46	1.08	-1.18	0.02	0.12	2.77	-0.82	1.32	-1.75	-0.14	15.56	10.4	6.13	-4.41	-6.13	9.97	-10.14	-6.9	10.14	6.89	1.93	-3.44	-6.16	6.16	17.08	1.32	-16.52	-1.58	-1.36	-1.42	2.43	3.72	1.98	0	-15.57	-10.4
15	2.66	4.26	0.82	0.8	1.02	0.45	3.4	1.29	2.53	0.6	1.66	-0.1	8.26	14.21	5.77	-1.75	-5.14	1.75	-9.29	-2.67	9.29	2.67	2.29	-7.76	-3.4	7.91	13.52	27.24	-10.91	-14.07	-9.11	2.28	-4.36	-1.95	0.34	1.34	-8.26	-14.21
16	3.8	6.21	1.09	2.54	-1.62	0.11	2.73	2.38	0.97	1.36	-0.81	0.35	13.55	11.96	-6.21	4.77	12.55	-4.77	-7.28	0.01	7.28	-0.01	8.37	-4.76	1.74	1.38	8.65	5.54	-22.88	-5.86	1.37	0.13	4.35	0.65	1.15	1.67	-13.55	-11.96
17	4.93	7.13	1.54	3.99	1.83	0.86	0.13	-1.9	0.64	-1.93	1.15	-1.95	13.59	12.07	-3.22	-0.19	3.22	0.19	-2.55	-2.61	-2.66	1.56	-1.74	-7.77	3.32	7.08	12.05	28.36	-15.41	-39.11	12.2	0.76	-16.46	1.58	1.66	0.04	-13.59	-12.07
18	4.68	1.06	2.17	0.65	0.34	0.01	0.46	0.86	0.1	0.67	-0.27	0.46	9.45	1.66	2.06	-1.13	-2.07	1.13	-2.03	-8.74	-4.53	5.83	0.13	0.56	-2.04	-0.2	10.94	0.44	-10.41	3.08	-4.21	3.03	4.33	-5.35	0.67	-0.28	-9.45	-1.66
19	7.67	5.01	2.69	2.68	-2.29	0.35	-0.28	-0.1	-0.68	0.36	-1.08	0.47	6.31	11.6	-2.21	-2	2.23	2	1.4	-7.5	-3.75	8.44	6.44	-4.43	-2.29	3.77	16.19	4.59	-8.93	1.09	-4.18	5.69	2.27	-2.01	-0.3	-1.04	-6.31	-11.6
20	7.14	3.76	3.15	1.46	0.84	-0.83	0.49	1.79	-0.47	0.85	-0.62	-0.1	10.01	9.59	-3.31	5.12	3.31	-5.12	-6.16	-6.47	-6.9	6.84	-2.35	-3.42	4.05	1.13	26.73	16.88	-27.32	-15.51	-9.53	6.89	9.78	-8.25	0.65	0.41	-9.44	-9.59
21	4.82	8.46	1.45	3.7	1.92	-1.06	-0.72	0.32	-0.56	-0.59	-0.38	-1.5	14.88	20.8	0.86	-5.22	-0.86	4.98	-4.66	-7.23	-3.26	-9.17	0.09	-3.65	-0.46	4.86	-2.83	24.68	0.61	-16.43	-7.14	2.14	11.97	-1.82	0.49	1.47	-14.88	-20.8
22	3.72	3.85	1.11	1.91	1.51	0.03	0.46	1.59	-0.3	0.75	-1.06	-0.1	9.71	7.82	-3.93	-1.55	3.93	4.36	-5.85	-5.78	-4.81	-0.89	0.33	-2.73	3.93	3.89	8.62	21.73	-5.9	-21.28	7.1	1.95	1.7	1.42	0.85	0.73	-9.71	-7.82
23	4.65	4.5	1.52	1.87	0.3	0.75	0.92	1.87	0.61	1.73	0.31	1.59	15.18	12.02	-2.07	-1.03	2.08	1.03	-4.08	-7.51	-3.7	-1.26	-5.18	2.01	5.54	-1.02	12	23.77	-9.26	-21.24	8.31	4.46	-6.26	-1.38	0.57	-0.34	-15.18	-12.02
24	3.61	2.96	2.3	0.42	0.99	1.57	-0.41	2.42	-0.81	1.57	-1.21	0.12	5.48	-4.35	2.28	6.3	-2.28	-6.3	-3.79	8.56	-0.59	3.35	-4.26	-0.2	-0.09	-3.17	16.74	0.23	-17.6	1.52	5.15	5	-1.7	-6.97	0.88	-0.29	-5.48	4.35
25	6.41	5.57	2.52	2.59	-1.36	-0.37	-0.04	-1.29	0.16	-0.86	0.36	-0.43	8.09	11.73	-1.52	-2.23	1.04	2.1	-5.88	0.91	0.76	2.3	2.86	-5.11	-1.47	3.09	-1.91	19.01	8.19	-19.01	2.94	2.53	1.39	-2.86	0.53	1.14	-8.09	-11.73
26	1.66	-1.57	0.47	-2.49	0.38	2.25	-0.35	1.22	0.25	0.78	0.83	0.35	4.96	15.3	-4.08	-3.1	3.27	3.1	-3.28	-9.75	0.51	3.29	-3.22	2.06	3.92	1.53	18.54	17.14	-16.47	-17	-3.03	-0.11	23.02	0.87	-0.03	0.01	-4.97	-15.3
27	4.96	5.97	2.57	3.01	0.18	0.94	2.26	3	0.88	1.23	-0.49	0.51	9.12	13.56	-7.6	2.75	7.6	-2.74	-9.31	-2.7	7.87	2.03	5.02	5.06	1	-5.72	1.73	3.86	0.16	-4.04	-20.63	1	25.57	1.13	1.84	-0.03	-9.12	-13.57
28	5.18	3.88	1.72	1.14	1.65	-0.23	0.12	2.02	0.13	1.38	0.15	0.75	10.34	10.61	-0.27	-4.44	0.27	4.43	-6.34	-4.62	6.83	-1.9	-1.1	-3.84	0.65	5.79	12.35	19	-7.97	-16.25	5.06	-0.52	-9.92	3.57	1.44	0.86	-10.07	-10.6
29	3.93	5.64	1.59	1.11	0.75	1.93	0.4	0.65	0.28	0.16	0.16	-0.35	10.05	17.72	0.92	-3.46	-0.92	3.19	-7.55	-11.98	2.81	0.76	0.25	4.09	-0.96	2.07	1.53	20.22	-2.46	-19.24	-12.49	-2.12	2.57	1.95	1.96	2.49	-10.04	-17.73
30	4.66	4.4	2.04	2.55	-0.58	0.72	0.12	1.41	-0.41	0.81	-0.95	0.2	12.13	9.65	2.72	-4.13	-2.26	4.13	-1.66	-2.84	1.19	2.92	-6.42	2.22	5.59	1.51	1.2	-9.07	-0.78	-1.28	-2.79	-1.32	1.8	1.7	0.52	-0.2	-12.13	-9.65
31	5.08	2.47	2.37	0.93	0.26	-0.61	1.31	3.55	1.11	2.44	0.91	1.33	11.9	6.92	0.66	-2.38	-0.66	2.38	-0.8	1.27	-2.6	2.31	-10.34	-5.15	6.01	4.89	18.69	8.54	-18.82	-8.53	1.03	1.63	-3.7	-5.55	2.09	0.9	-11.9	-6.92
32	4.38	7.04	1.61	3.35	0.77	1.19	1.35	1.64	0.57	0.94	-0.21	0.24	14.39	13.98	-5.85	2.18	5.85	-2.18	-3.93	-6.09	2.93	2.05	2.81	-2.03	1.99	-0.65	16.93	20.72	-18.36	-19.75	7.78	3	0.25	-0.42	0.49	1.61	-14.39	-13.98
	UR3tip-FP	UR3tip-FP	UR3Center-FP	UR3Center-FP	UR3apex-FP	UR3apex-FP	UR6tip-FP	UR6tip-FP	UR6Center-FP	UR6Center-FP	UR6apex-FP	UR6apex-FP	UR3-tipping-horizontal plane	UR3-tipping-horizontal plane	UR6-tipping- FP	UR6-tipping- FP	UR6-tipping - HP	UR6-tipping - HP	UR3-torque/ MSP	UR3-torque/ MSP	UR3 torque- Horizontal plane	UR3 torque- Horizontal plane	UR6torque - MSP	UR6torque - MSP	UR6torque - HP	UR6torque - HP	UR3Rotation - MSP	UR3Rotation - MSP	UR3Rotation - FP	UR3Rotation - FP	UR6Rotation - MSP	UR6Rotation - MSP	UR6Rotation - FP	UR6Rotation - FP	UR3-Root Length	UR3-Root Length	UR3-tipping-/FP	UR3-tipping-/FP
Shapiro wilk	#REF!	#REF!	#REF!	#REF!	#REF!	#REF!	#REF!	#REF!	#REF!	#REF!	#REF!	#REF!	#REF!	#REF!	#REF!	#REF!	#REF!	#REF!	#REF!	#REF!	#REF!	#REF!	#REF!	#REF!	#REF!	#REF!	#REF!	#REF!	#REF!	#REF!	#REF!	#REF!	#REF!	#REF!	#REF!	#REF!	#REF!	#REF!
Levene's		0.257175		0.820954		0.188078
T Test eq		0.64524		0.631703		0.330482		0.0873234		0.167079		0.710473		0.373425		0.837359		0.67453		0.550652		0.21647		0.755575		0.984447		0.171687		0.146344		0.00503304		0.0173322		0.289409		0.646019
Kruskal - Wallis				0.893						0.076		0.603		0.036		0.883		2.84		0.757		0.515
Mean	4.7575	4.54	1.86312	1.72156	0.0690625	0.35625	0.872813	1.35531	0.436875	0.729687	0.0259375	0.104688	10.1741	11.2562	-1.14156	-0.952813	1.37156	0.94125	-4.32188	-4.96969	1.935	3.45656	-0.839687	-1.16125	1.69906	1.71844	11.9978	15.1059	-11.3706	-14.9528	-3.525	2.22188	3.06781	-1.8775	0.81375	0.577813	-10.1184	-8.91531
SD	1.31526	2.31141	0.794531	1.46022	1.31472	1.0074	1.09912	1.12276	0.871863	0.802237	0.964565	0.704648	4.05468	5.49388	3.71957	3.60472	4.15069	4.00683	4.45586	4.17622	5.61983	3.99133	4.49685	3.6909	4.18642	3.71896	7.8771	9.98105	8.93247	10.4868	10.8055	2.85702	10.8318	3.68301	0.691724	1.03999	4.05295	14.1778
Median	4.875	4.49	1.77	1.89	0.28	0.4	0.575	1.46	0.265	0.795	-0.02	0.2	10.47	11.665	-0.815	-1.525	0.55	1.625	-4.24	-5.45	1.205	3.105	0.11	-1.245	1.865	1.8	12.025	18.07	-9.835	-16.34	-3.605	2.21	2.325	-1.6	0.66	0.68	-10.16	-11.595
Min	1.66	-1.57	0.47	-2.49	-2.44	-2.57	-0.72	-1.9	-0.82	-1.93	-1.75	-1.95	-4.02	-4.35	-7.6	-7.16	-6.13	-6.3	-11.36	-11.98	-9.8	-9.17	-10.34	-7.77	-6.16	-5.72	-2.83	-9.07	-29	-39.6	-20.63	-2.21	-24.71	-8.38	-0.42	-1.63	-15.57	-22.28
Max	7.67	8.46	3.54	3.99	2.05	2.25	3.4	3.55	2.53	2.44	2.09	1.59	15.56	22.29	6.13	6.3	12.55	9.97	9.8	8.56	11.36	9.97	8.37	6.09	10.14	7.91	26.73	30.95	8.19	3.08	29.93	10.63	25.57	3.72	2.09	3.42	4.02	62.72
UR3tip-FP
			Intervention	Control	P - Value
		Mean	4.7575	4.54
		SD	1.31526	2.31141	0.64524
		Column1	Intervention	Control
		Mean	4.7575	4.54
UR3Center-FP
			Intervention	Control	P - Value
		Mean	1.86312	1.72156
		SD	0.794531	1.46022	0.893
		Column1	Intervention	Control
		Mean	1.86312	1.72156
UR3apex-FP
			Intervention	Control	P - Value
		Mean	0.0690625	0.35625
		SD	1.31472	1.0074	0.330482
		Column1	Intervention	Control
		Mean	0.0690625	0.35625
UR6tip-FP
			Intervention	Control	P - Value
		Mean	0.872813	1.35531
		SD	1.09912	1.12276	0.0873234
		Column1	Intervention	Control
		Mean	0.872813	1.35531
UR6Center-FP
			Intervention	Control	P - Value
		Mean	0.436875	0.729687
		SD	0.871863	0.802237	0.076
		Column1	Intervention	Control
		Median	0.436875	0.729687
UR6apex-FP
			Intervention	Control	P - Value
		Mean	0.0259375	0.104688
		SD	0.964565	0.704648	0.710473
		Column1	Intervention	Control
		Mean	0.0259375	0.104688
UR3-tipping-horizontal plane
			Intervention	Control	P - Value
		Mean	10.1741	11.2562
		SD	4.05468	5.49388	0.036
		Column1	Intervention	Control
		Mean	10.1741	11.2562
UR6-tipping- FP
			Intervention	Control	P - Value
		Mean	-1.14156	-0.952813
		SD	3.71957	3.60472	0.883
		Column1	Intervention	Control
		Mean	-1.14156	-0.952813
UR6-tipping - HP
			Intervention	Control	P - Value
		Mean	1.37156	0.94125
		SD	4.15069	4.00683	0.67453
		Column1	Intervention	Control
		Mean	1.37156	0.94125
UR3-torque/ MSP
			Intervention	Control	P - Value
		Mean	-4.32188	-4.96969
		0	4.45586	4.17622	0.757
		Column1	Intervention	Control
		Mean	-4.32188	-4.96969
UR3 torque- Horizontal plane
			Intervention	Control	P - Value
		Mean	1.935	3.45656
		SD	5.61983	3.99133	0.515
		Column1	Intervention	Control
		Mean	1.935	3.45656
UR6torque - MSP
			Intervention	Control	P - Value
		Mean	-0.839687	-1.16125
		SD	4.49685	3.6909	0.755575
		Column1	Intervention	Control
		Mean	-0.839687	-1.16125
UR6torque - HP
			Intervention	Control	P - Value
		Mean	1.69906	1.71844
		0	4.18642	3.71896	0.984447
		Column1	Intervention	Control
		Mean	1.69906	1.71844
UR3Rotation - MSP
			Intervention	Control	P - Value
		Mean	11.9978	15.1059
		SD	7.8771	9.98105	0.171687
		Column1	Intervention	Control
		Mean	11.9978	15.1059
UR3Rotation - FP
			Intervention	Control	P - Value
		Mean	-11.3706	-14.9528
		SD	8.93247	10.4868	0.146344
		Column1	Intervention	Control
		Mean	-11.3706	-14.9528
UR6Rotation - MSP
			Intervention	Control	P - Value
		Mean	-3.525	2.22188
		SD	10.8055	2.85702	0.00503304
		Column1	Intervention	Control
		Mean	-3.525	2.22188
UR6Rotation - FP
			Intervention	Control	P - Value
		Mean	3.06781	-1.8775
		SD	10.8318	3.68301	0.0173322
		Column1	Intervention	Control
		Mean	3.06781	-1.8775
UR3-Root Length
			Intervention	Control	P - Value
		Mean	0.81375	0.577813
		SD	0.691724	1.03999	0.289409
		Column1	Intervention	Control
		Mean	0.81375	0.577813
UR3-tipping-/FP
			Intervention	Control	P - Value
		Mean	-10.1184	-8.91531
		SD	4.05295	14.1778	0.646019
		Column1	Intervention	Control
		Mean	-10.1184	-8.91531
			Column1	Intervention	Control
			0	0	0
			0	0	0
			0	0	0
			Column1	Intervention	0
			Mean	-11.3706	0
			0	0	0
			0	0	0
			0	0	0
			0	0	0
			0	0	0
			0	0	0
				Intervention	Control	P - Value
		UR3Center-FP	Mean	1.86312	1.72156
			SD	0.794531	1.46022	0.893
		UR3apex-FP	Mean	0.0690625	0.35625
			SD	1.31472	1.0074	0
		UR6tip-FP	Mean	0.872813	1.35531
			SD	1.09912	1.12276	0
		UR6Center-FP	Mean	0.436875	0.729687
			SD	0.871863	0.802237	0.076
		UR6apex-FP	Mean	0.0259375	0.104688
			SD	0.964565	0.704648	0.603
		UR3-tipping-horizontal plane	Mean	10.1741	11.2562
			SD	4.05468	5.49388	0.036
		UR6-tipping- FP	Mean	-1.14156	-0.952813
			SD	3.71957	3.60472	0.883
		UR6-tipping - HP	Mean	1.37156	0.94125
			SD	4.15069	4.00683	2.84
		UR3-torque/ MSP	Mean	-4.32188	-4.96969
			SD	4.45586	4.17622	0.757
		UR3 torque- Horizontal plane	Mean	1.935	3.45656
			SD	5.61983	3.99133	0.515
		UR6torque - MSP	Mean	-0.839687	-1.16125
			SD	4.49685	3.6909	0

## Sheet: Continous SPSS
Treatment	UR3tip-FP	UR3Center-FP	UR3apex-FP	UR6tip-FP	UR6Center-FP	UR6apex-FP	UR3-tipping-horizontal plane	UR6-tipping- FP	UR6-tipping - HP	UR3-torque/ MSP	UR3 torque- Horizontal plane	UR6torque - MSP	UR6torque - HP	UR3Rotation - MSP	UR3Rotation - FP	UR6Rotation - MSP	UR6Rotation - FP	UR3-Root Length	UR3tip-FP	UR3tip-FP	UR3Center-FP	UR3Center-FP	UR3apex-FP	UR3apex-FP	UR6tip-FP	UR6tip-FP	UR6Center-FP	UR6Center-FP	UR6apex-FP	UR6apex-FP	UR3-tipping-horizontal plane	UR3-tipping-horizontal plane	UR6-tipping- FP	UR6-tipping- FP	UR6-tipping - HP	UR6-tipping - HP	UR3-torque/ MSP	UR3-torque/ MSP	UR3 torque- Horizontal plane	UR3 torque- Horizontal plane	UR6torque - MSP	UR6torque - MSP	UR6torque - HP	UR6torque - HP	UR3Rotation - MSP	UR3Rotation - MSP	UR3Rotation - FP	UR3Rotation - FP	UR6Rotation - MSP
Group A	5.53	2.31	0.12	0.94	0.96	0.98	13.35	0.15	-0.14	-1.75	1.75	2.05	-1.77	18.46	-18.92	-9.14	7.8	1.23	5.53	8.39	2.31	2.91	0.12	-2.57	0.94	1.04	0.96	0.78	0.98	0.52	13.35	11.54	0.15	-1.37	-0.14	1.37	-1.75	-5.12	1.75	9.97	2.05	3.28	-1.77	-1.9	18.46	26.07	-18.92	-22.51	-9.14
Group A	3.67	2.15	-0.63	0.9	0.81	0.73	6.03	-1.06	0.48	-0.06	0.06	-3.98	4.01	8.99	-8.96	-15.12	14.29	0.14	3.67	3.36	2.15	1.93	-0.63	-0.5	0.9	2.17	0.81	1.42	0.73	0.66	6.03	5.72	-1.06	-4.57	0.48	4.04	-0.06	-7	0.06	7	-3.98	-0.46	4.01	4	8.99	7.78	-8.96	-7.68	-15.12
Group A	6.86	3.1	-0.66	2.44	1.12	-0.19	13.25	-5.24	7.02	-4.4	4.4	-6.78	9.65	25.56	-22.25	-20.25	17.35	0.19	6.86	4.53	3.1	2.72	-0.66	0.91	2.44	1.69	1.12	0.94	-0.19	0.19	13.25	9.9	-5.24	3.6	7.02	-3.59	-4.4	-0.17	4.4	0.17	-6.78	-4.63	9.65	3.8	25.56	11.2	-22.25	-10.98	-20.25
Group A	5.25	1.45	-2.35	0.66	0.12	-0.42	10.96	-3.09	3.09	9.8	-9.8	2.98	2.2	16.26	-15.23	29.93	-24.71	0.03	5.25	6.59	1.45	0.13	-2.35	0.81	0.66	1.9	0.12	0.93	-0.42	-0.03	10.96	22.29	-3.09	5.58	3.09	-5.58	9.8	-8.25	-9.8	5.75	2.98	1.86	2.2	-4.86	16.26	23.6	-15.23	-23.1	29.93
Group A	3.4	0.68	2.05	1.34	0.15	-1.06	12.81	-6.99	6.99	-10.65	10.65	1.61	4.91	23.76	-25.46	-0.7	1.53	-0.42	3.4	5.5	0.68	2.51	2.05	-0.48	1.34	1.44	0.15	0.44	-1.06	-0.57	12.81	14.09	-6.99	-5.43	6.99	5.43	-10.65	-4.3	10.65	4.3	1.61	1.14	4.91	5.07	23.76	9.15	-25.46	-4	-0.7
Group A	3.87	0.97	1.95	0.49	0.51	0.53	10.6	-0.04	0.04	1.83	-1.84	-3.46	3.37	5.17	-4.64	-15.78	13.52	1.05	3.87	4.93	0.97	2.73	1.95	-0.66	0.49	1.48	0.51	0.84	0.53	0.2	10.6	9.32	-0.04	-1.16	0.04	-2.43	1.83	-9.43	-1.84	9.43	-3.46	-3.44	3.37	2.64	5.17	22.54	-4.64	-14.84	-15.78
Group A	3.5	0.52	-2.44	2.27	2.18	2.09	14.09	-0.57	0.57	-1.22	1.22	0.13	0.08	7.62	-7.6	-9.38	3.47	0.12	3.5	6.84	0.52	2.84	-2.44	1.55	2.27	1.02	2.18	0.46	2.09	-0.1	14.09	17.76	-0.57	-4.13	0.57	3.94	-1.22	-4.42	1.22	4.42	0.13	-4.52	0.08	5.28	7.62	22.47	-7.6	-26.39	-9.38
Group A	2.99	1.82	0.64	2.11	1.42	0.73	5.02	4.25	-4.25	-9.97	9.97	-0.75	-4.09	7.67	-7.14	-8.84	2.38	0.6	2.99	4.45	1.82	1.06	0.64	1.78	2.11	2.29	1.42	1.55	0.73	0.81	5.02	12.1	4.25	4.09	-4.25	-4.09	-9.97	-1.44	9.97	1.44	-0.75	-0.24	-4.09	-1.17	7.67	3.83	-7.14	-12.26	-8.84
Group A	5.35	3.54	0.08	-0.5	-0.13	0.24	-4.02	-2.08	2.08	-3.04	3.04	-9.78	9.98	9.6	-4.43	-2.28	12.77	1.01	5.35	7.78	3.54	3.32	0.08	0.02	-0.5	0.11	-0.13	0.38	0.24	0.65	-4.02	17.97	-2.08	-1.5	2.08	1.5	-3.04	-9.77	3.04	9.77	-9.78	6.09	9.98	-4.3	9.6	23.08	-4.43	-21.67	-2.28
Group A	5.61	1.4	-1.23	-0.65	-0.55	-0.47	9.41	-0.54	0.53	-0.08	0.08	-3.52	2.54	3.68	-1.89	6.7	-7.85	0.1	5.61	0.5	1.4	-2.01	-1.23	0.84	-0.65	1.02	-0.55	0.62	-0.47	0.22	9.41	11.58	-0.54	-1.35	0.53	-2.45	-0.08	-7.14	0.08	5.77	-3.52	3.17	2.54	-3.94	3.68	20.12	-1.89	-20.11	6.7
Group A	5.87	2.69	-0.49	0.92	-0.28	-1.48	13.58	-7.27	7.27	-4.87	4.87	-7.31	10.14	25.36	-29	-12.68	-7.04	1.55	5.87	0.58	2.69	0.47	-0.49	0.81	0.92	1.18	-0.28	0.81	-1.48	0.44	13.58	-0.13	-7.27	2.22	7.27	-2.22	-4.87	-10.21	4.87	2.12	-7.31	-2.98	10.14	-0.43	25.36	13.2	-29	-24.1	-12.68
Group A	5.29	1.22	1.01	2.24	1.91	1.58	10.73	0.08	-0.08	-9.35	9.35	4.52	-2.7	7.79	-4.45	-18.72	18.59	0.99	5.29	3.62	1.22	1.63	1.01	-0.36	2.24	0.6	1.91	0.08	1.58	-0.46	10.73	8.86	0.08	-3.41	-0.08	3.41	-9.35	-4.58	9.35	7.9	4.52	2.28	-2.7	-0.02	7.79	30.95	-4.45	-39.6	-18.72
Group A	5.02	2.58	-1.55	2.3	1.58	0.87	6.8	4.74	-4.74	-11.36	11.36	1.51	-4.82	15.26	-12.85	-13.01	-2.96	1.67	5.02	4.48	2.58	1.56	-1.55	1.17	2.3	1.94	1.58	0.53	0.87	-0.88	6.8	11.95	4.74	-7.16	-4.74	7.16	-11.36	-4.56	11.36	4.56	1.51	-0.42	-4.82	6.52	15.26	15.2	-12.85	-16.76	-13.01
Group A	6.09	2.46	-1.18	0.12	-0.82	-1.75	15.56	6.13	-6.13	-10.14	10.14	1.93	-6.16	17.08	-16.52	-1.36	2.43	1.98	6.09	3.13	2.46	1.08	-1.18	0.02	0.12	2.77	-0.82	1.32	-1.75	-0.14	15.56	10.4	6.13	-4.41	-6.13	9.97	-10.14	-6.9	10.14	6.89	1.93	-3.44	-6.16	6.16	17.08	1.32	-16.52	-1.58	-1.36
Group A	2.66	0.82	1.02	3.4	2.53	1.66	8.26	5.77	-5.14	-9.29	9.29	2.29	-3.4	13.52	-10.91	-9.11	-4.36	0.34	2.66	4.26	0.82	0.8	1.02	0.45	3.4	1.29	2.53	0.6	1.66	-0.1	8.26	14.21	5.77	-1.75	-5.14	1.75	-9.29	-2.67	9.29	2.67	2.29	-7.76	-3.4	7.91	13.52	27.24	-10.91	-14.07	-9.11
Group A	3.8	1.09	-1.62	2.73	0.97	-0.81	13.55	-6.21	12.55	-7.28	7.28	8.37	1.74	8.65	-22.88	1.37	4.35	1.15	3.8	6.21	1.09	2.54	-1.62	0.11	2.73	2.38	0.97	1.36	-0.81	0.35	13.55	11.96	-6.21	4.77	12.55	-4.77	-7.28	0.01	7.28	-0.01	8.37	-4.76	1.74	1.38	8.65	5.54	-22.88	-5.86	1.37
Group A	4.93	1.54	1.83	0.13	0.64	1.15	13.59	-3.22	3.22	-2.55	-2.66	-1.74	3.32	12.05	-15.41	12.2	-16.46	1.66	4.93	7.13	1.54	3.99	1.83	0.86	0.13	-1.9	0.64	-1.93	1.15	-1.95	13.59	12.07	-3.22	-0.19	3.22	0.19	-2.55	-2.61	-2.66	1.56	-1.74	-7.77	3.32	7.08	12.05	28.36	-15.41	-39.11	12.2
Group A	4.68	2.17	0.34	0.46	0.1	-0.27	9.45	2.06	-2.07	-2.03	-4.53	0.13	-2.04	10.94	-10.41	-4.21	4.33	0.67	4.68	1.06	2.17	0.65	0.34	0.01	0.46	0.86	0.1	0.67	-0.27	0.46	9.45	1.66	2.06	-1.13	-2.07	1.13	-2.03	-8.74	-4.53	5.83	0.13	0.56	-2.04	-0.2	10.94	0.44	-10.41	3.08	-4.21
Group A	7.67	2.69	-2.29	-0.28	-0.68	-1.08	6.31	-2.21	2.23	1.4	-3.75	6.44	-2.29	16.19	-8.93	-4.18	2.27	-0.3	7.67	5.01	2.69	2.68	-2.29	0.35	-0.28	-0.1	-0.68	0.36	-1.08	0.47	6.31	11.6	-2.21	-2	2.23	2	1.4	-7.5	-3.75	8.44	6.44	-4.43	-2.29	3.77	16.19	4.59	-8.93	1.09	-4.18
Group A	7.14	3.15	0.84	0.49	-0.47	-0.62	10.01	-3.31	3.31	-6.16	-6.9	-2.35	4.05	26.73	-27.32	-9.53	9.78	0.65	7.14	3.76	3.15	1.46	0.84	-0.83	0.49	1.79	-0.47	0.85	-0.62	-0.1	10.01	9.59	-3.31	5.12	3.31	-5.12	-6.16	-6.47	-6.9	6.84	-2.35	-3.42	4.05	1.13	26.73	16.88	-27.32	-15.51	-9.53
Group A	4.82	1.45	1.92	-0.72	-0.56	-0.38	14.88	0.86	-0.86	-4.66	-3.26	0.09	-0.46	-2.83	0.61	-7.14	11.97	0.49	4.82	8.46	1.45	3.7	1.92	-1.06	-0.72	0.32	-0.56	-0.59	-0.38	-1.5	14.88	20.8	0.86	-5.22	-0.86	4.98	-4.66	-7.23	-3.26	-9.17	0.09	-3.65	-0.46	4.86	-2.83	24.68	0.61	-16.43	-7.14
Group A	3.72	1.11	1.51	0.46	-0.3	-1.06	9.71	-3.93	3.93	-5.85	-4.81	0.33	3.93	8.62	-5.9	7.1	1.7	0.85	3.72	3.85	1.11	1.91	1.51	0.03	0.46	1.59	-0.3	0.75	-1.06	-0.1	9.71	7.82	-3.93	-1.55	3.93	4.36	-5.85	-5.78	-4.81	-0.89	0.33	-2.73	3.93	3.89	8.62	21.73	-5.9	-21.28	7.1
Group A	4.65	1.52	0.3	0.92	0.61	0.31	15.18	-2.07	2.08	-4.08	-3.7	-5.18	5.54	12	-9.26	8.31	-6.26	0.57	4.65	4.5	1.52	1.87	0.3	0.75	0.92	1.87	0.61	1.73	0.31	1.59	15.18	12.02	-2.07	-1.03	2.08	1.03	-4.08	-7.51	-3.7	-1.26	-5.18	2.01	5.54	-1.02	12	23.77	-9.26	-21.24	8.31
Group A	3.61	2.3	0.99	-0.41	-0.81	-1.21	5.48	2.28	-2.28	-3.79	-0.59	-4.26	-0.09	16.74	-17.6	5.15	-1.7	0.88	3.61	2.96	2.3	0.42	0.99	1.57	-0.41	2.42	-0.81	1.57	-1.21	0.12	5.48	-4.35	2.28	6.3	-2.28	-6.3	-3.79	8.56	-0.59	3.35	-4.26	-0.2	-0.09	-3.17	16.74	0.23	-17.6	1.52	5.15
Group A	6.41	2.52	-1.36	-0.04	0.16	0.36	8.09	-1.52	1.04	-5.88	0.76	2.86	-1.47	-1.91	8.19	2.94	1.39	0.53	6.41	5.57	2.52	2.59	-1.36	-0.37	-0.04	-1.29	0.16	-0.86	0.36	-0.43	8.09	11.73	-1.52	-2.23	1.04	2.1	-5.88	0.91	0.76	2.3	2.86	-5.11	-1.47	3.09	-1.91	19.01	8.19	-19.01	2.94
Group A	1.66	0.47	0.38	-0.35	0.25	0.83	4.96	-4.08	3.27	-3.28	0.51	-3.22	3.92	18.54	-16.47	-3.03	23.02	-0.03	1.66	-1.57	0.47	-2.49	0.38	2.25	-0.35	1.22	0.25	0.78	0.83	0.35	4.96	15.3	-4.08	-3.1	3.27	3.1	-3.28	-9.75	0.51	3.29	-3.22	2.06	3.92	1.53	18.54	17.14	-16.47	-17	-3.03
Group A	4.96	2.57	0.18	2.26	0.88	-0.49	9.12	-7.6	7.6	-9.31	7.87	5.02	1	1.73	0.16	-20.63	25.57	1.84	4.96	5.97	2.57	3.01	0.18	0.94	2.26	3	0.88	1.23	-0.49	0.51	9.12	13.56	-7.6	2.75	7.6	-2.74	-9.31	-2.7	7.87	2.03	5.02	5.06	1	-5.72	1.73	3.86	0.16	-4.04	-20.63
Group A	5.18	1.72	1.65	0.12	0.13	0.15	10.34	-0.27	0.27	-6.34	6.83	-1.1	0.65	12.35	-7.97	5.06	-9.92	1.44	5.18	3.88	1.72	1.14	1.65	-0.23	0.12	2.02	0.13	1.38	0.15	0.75	10.34	10.61	-0.27	-4.44	0.27	4.43	-6.34	-4.62	6.83	-1.9	-1.1	-3.84	0.65	5.79	12.35	19	-7.97	-16.25	5.06
Group A	3.93	1.59	0.75	0.4	0.28	0.16	10.05	0.92	-0.92	-7.55	2.81	0.25	-0.96	1.53	-2.46	-12.49	2.57	1.96	3.93	5.64	1.59	1.11	0.75	1.93	0.4	0.65	0.28	0.16	0.16	-0.35	10.05	17.72	0.92	-3.46	-0.92	3.19	-7.55	-11.98	2.81	0.76	0.25	4.09	-0.96	2.07	1.53	20.22	-2.46	-19.24	-12.49
Group A	4.66	2.04	-0.58	0.12	-0.41	-0.95	12.13	2.72	-2.26	-1.66	1.19	-6.42	5.59	1.2	-0.78	-2.79	1.8	0.52	4.66	4.4	2.04	2.55	-0.58	0.72	0.12	1.41	-0.41	0.81	-0.95	0.2	12.13	9.65	2.72	-4.13	-2.26	4.13	-1.66	-2.84	1.19	2.92	-6.42	2.22	5.59	1.51	1.2	-9.07	-0.78	-1.28	-2.79
Group A	5.08	2.37	0.26	1.31	1.11	0.91	11.9	0.66	-0.66	-0.8	-2.6	-10.34	6.01	18.69	-18.82	1.03	-3.7	2.09	5.08	2.47	2.37	0.93	0.26	-0.61	1.31	3.55	1.11	2.44	0.91	1.33	11.9	6.92	0.66	-2.38	-0.66	2.38	-0.8	1.27	-2.6	2.31	-10.34	-5.15	6.01	4.89	18.69	8.54	-18.82	-8.53	1.03
Group A	4.38	1.61	0.77	1.35	0.57	-0.21	14.39	-5.85	5.85	-3.93	2.93	2.81	1.99	16.93	-18.36	7.78	0.25	0.49	4.38	7.04	1.61	3.35	0.77	1.19	1.35	1.64	0.57	0.94	-0.21	0.24	14.39	13.98	-5.85	2.18	5.85	-2.18	-3.93	-6.09	2.93	2.05	2.81	-2.03	1.99	-0.65	16.93	20.72	-18.36	-19.75	7.78
Group B	8.39	2.91	-2.57	1.04	0.78	0.52	11.54	-1.37	1.37	-5.12	9.97	3.28	-1.9	26.07	-22.51	1	-1.04	-0.5
Group B	3.36	1.93	-0.5	2.17	1.42	0.66	5.72	-4.57	4.04	-7	7	-0.46	4	7.78	-7.68	10.63	-3.01	0.69
Group B	4.53	2.72	0.91	1.69	0.94	0.19	9.9	3.6	-3.59	-0.17	0.17	-4.63	3.8	11.2	-10.98	1.54	-8.38	-1.63
Group B	6.59	0.13	0.81	1.9	0.93	-0.03	22.29	5.58	-5.58	-8.25	5.75	1.86	-4.86	23.6	-23.1	5.49	-4.77	3.42
Group B	5.5	2.51	-0.48	1.44	0.44	-0.57	14.09	-5.43	5.43	-4.3	4.3	1.14	5.07	9.15	-4	2.31	-1.06	-0.27
Group B	4.93	2.73	-0.66	1.48	0.84	0.2	9.32	-1.16	-2.43	-9.43	9.43	-3.44	2.64	22.54	-14.84	6.22	-5.72	-0.66
Group B	6.84	2.84	1.55	1.02	0.46	-0.1	17.76	-4.13	3.94	-4.42	4.42	-4.52	5.28	22.47	-26.39	-2.21	3	0.52
Group B	4.45	1.06	1.78	2.29	1.55	0.81	12.1	4.09	-4.09	-1.44	1.44	-0.24	-1.17	3.83	-12.26	2.06	-4.46	0.95
Group B	7.78	3.32	0.02	0.11	0.38	0.65	17.97	-1.5	1.5	-9.77	9.77	6.09	-4.3	23.08	-21.67	2.81	0.54	1.91
Group B	0.5	-2.01	0.84	1.02	0.62	0.22	11.58	-1.35	-2.45	-7.14	5.77	3.17	-3.94	20.12	-20.11	3.06	-3.34	0.8
Group B	0.58	0.47	0.81	1.18	0.81	0.44	-0.13	2.22	-2.22	-10.21	2.12	-2.98	-0.43	13.2	-24.1	-2.1	2.93	0.67
Group B	3.62	1.63	-0.36	0.6	0.08	-0.46	8.86	-3.41	3.41	-4.58	7.9	2.28	-0.02	30.95	-39.6	2.61	-7.11	1.15
Group B	4.48	1.56	1.17	1.94	0.53	-0.88	11.95	-7.16	7.16	-4.56	4.56	-0.42	6.52	15.2	-16.76	2.68	-7.69	0.95
Group B	3.13	1.08	0.02	2.77	1.32	-0.14	10.4	-4.41	9.97	-6.9	6.89	-3.44	6.16	1.32	-1.58	-1.42	3.72	0
Group B	4.26	0.8	0.45	1.29	0.6	-0.1	14.21	-1.75	1.75	-2.67	2.67	-7.76	7.91	27.24	-14.07	2.28	-1.95	1.34
Group B	6.21	2.54	0.11	2.38	1.36	0.35	11.96	4.77	-4.77	0.01	-0.01	-4.76	1.38	5.54	-5.86	0.13	0.65	1.67
Group B	7.13	3.99	0.86	-1.9	-1.93	-1.95	12.07	-0.19	0.19	-2.61	1.56	-7.77	7.08	28.36	-39.11	0.76	1.58	0.04
Group B	1.06	0.65	0.01	0.86	0.67	0.46	1.66	-1.13	1.13	-8.74	5.83	0.56	-0.2	0.44	3.08	3.03	-5.35	-0.28
Group B	5.01	2.68	0.35	-0.1	0.36	0.47	11.6	-2	2	-7.5	8.44	-4.43	3.77	4.59	1.09	5.69	-2.01	-1.04
Group B	3.76	1.46	-0.83	1.79	0.85	-0.1	9.59	5.12	-5.12	-6.47	6.84	-3.42	1.13	16.88	-15.51	6.89	-8.25	0.41
Group B	8.46	3.7	-1.06	0.32	-0.59	-1.5	20.8	-5.22	4.98	-7.23	-9.17	-3.65	4.86	24.68	-16.43	2.14	-1.82	1.47
Group B	3.85	1.91	0.03	1.59	0.75	-0.1	7.82	-1.55	4.36	-5.78	-0.89	-2.73	3.89	21.73	-21.28	1.95	1.42	0.73
Group B	4.5	1.87	0.75	1.87	1.73	1.59	12.02	-1.03	1.03	-7.51	-1.26	2.01	-1.02	23.77	-21.24	4.46	-1.38	-0.34
Group B	2.96	0.42	1.57	2.42	1.57	0.12	-4.35	6.3	-6.3	8.56	3.35	-0.2	-3.17	0.23	1.52	5	-6.97	-0.29
Group B	5.57	2.59	-0.37	-1.29	-0.86	-0.43	11.73	-2.23	2.1	0.91	2.3	-5.11	3.09	19.01	-19.01	2.53	-2.86	1.14
Group B	-1.57	-2.49	2.25	1.22	0.78	0.35	15.3	-3.1	3.1	-9.75	3.29	2.06	1.53	17.14	-17	-0.11	0.87	0.01
Group B	5.97	3.01	0.94	3	1.23	0.51	13.56	2.75	-2.74	-2.7	2.03	5.06	-5.72	3.86	-4.04	1	1.13	-0.03
Group B	3.88	1.14	-0.23	2.02	1.38	0.75	10.61	-4.44	4.43	-4.62	-1.9	-3.84	5.79	19	-16.25	-0.52	3.57	0.86
Group B	5.64	1.11	1.93	0.65	0.16	-0.35	17.72	-3.46	3.19	-11.98	0.76	4.09	2.07	20.22	-19.24	-2.12	1.95	2.49
Group B	4.4	2.55	0.72	1.41	0.81	0.2	9.65	-4.13	4.13	-2.84	2.92	2.22	1.51	-9.07	-1.28	-1.32	1.7	-0.2
Group B	2.47	0.93	-0.61	3.55	2.44	1.33	6.92	-2.38	2.38	1.27	2.31	-5.15	4.89	8.54	-8.53	1.63	-5.55	0.9
Group B	7.04	3.35	1.19	1.64	0.94	0.24	13.98	2.18	-2.18	-6.09	2.05	-2.03	-0.65	20.72	-19.75	3	-0.42	1.61
[truncated: 5 more columns]
